1           **Bioengineered intestinal muscularis complexes with long-term**  
2                           **spontaneous and periodic contractions**

3  
4   Qianqian Wang<sup>1,5</sup>, Ke Wang<sup>2</sup>, R. Sergio Solorzano-Vargas<sup>3</sup>, Po-Yu Lin<sup>1,5</sup>, Christopher M. Walthers<sup>1</sup>,  
5   Anne-Laure Thomas<sup>5</sup>, Martín G. Martín<sup>3</sup>, James C. Y. Dunn<sup>4,5</sup> \*

6           1. Department of Bioengineering, Henry Samueli School of Engineering and Applied Science,  
7                           University of California Los Angeles, Los Angeles, California, USA.

8           2. Department of Computer Science, University of North Carolina at Chapel Hill, Chapel Hill,  
9                           North Carolina, USA.

10          3. Department of Pediatrics, Division of Gastroenterology and Nutrition, Mattel Children's  
11                           Hospital and the David Geffen School of Medicine at UCLA, University of California Los  
12                           Angeles, Los Angeles, California, USA.

13          4. Department of Bioengineering, Stanford University, Stanford, California, USA.

14          5. Division of Pediatric Surgery, Department of Surgery, Stanford University School of  
15                           Medicine, Stanford University, Stanford, California, USA.

16   **Materials & Correspondence:** Correspondence and material requests should be addressed to  
17   J.C.Y.D. ([jdunn2@stanford.edu](mailto:jdunn2@stanford.edu)).

18

19 **Abstract:** Although critical for studies of gut motility and intestinal regeneration, the *in vitro*  
20 culture of intestinal muscularis with peristaltic function remains a significant challenge. Periodic  
21 contractions of intestinal muscularis result from the coordinated activity of smooth muscle cells  
22 (SMC), the enteric nervous system (ENS), and interstitial cells of Cajal (ICC). Reproducing this  
23 activity requires the preservation of all these cells in one system. Here we report the first serum-  
24 free culture methodology that consistently maintains spontaneous and periodic contractions of  
25 murine and human intestinal muscularis cells for months. In this system, SMC expressed the  
26 mature marker myosin heavy chain, and multipolar/dipolar ICC, uniaxonal/multipolar neurons  
27 and glial cells were present. Furthermore, drugs affecting ENS, ICC or SMC altered the  
28 contractions. Combining this method with scaffolds, contracting cell sheets were formed with  
29 organized architecture. With the addition of intestinal epithelial cells, this platform enabled at  
30 least 9 types of cells from mucosa and muscularis to coexist and function. The method constitutes  
31 a powerful tool for mechanistic studies of gut motility disorders and the regeneration of full-  
32 thickness engineered intestine.

33 In the small intestine, the mucosa processes partially digested food and absorbs nutrients while  
34 the muscularis actuates the peristaltic flow to transport luminal content aborally. Gut motility is  
35 central to its digestive and absorptive function. The intestinal muscularis contains various types  
36 of cells: of these, smooth muscle cells, the enteric nervous system (ENS)<sup>1,2</sup>, and the pacemaker  
37 interstitial cells of Cajal (ICC)<sup>3</sup> are three important players involved in the development of gut  
38 motility. Recent studies on intestinal tissue engineering have highlighted the importance of  
39 regenerating the functional intestinal muscularis<sup>4-9</sup>. A variety of systems derived from different  
40 cell sources, including pluripotent stem cells (PSC)<sup>4-6</sup>, embryonic stem cells (ESC)<sup>7</sup> and primary  
41 tissue<sup>8,9</sup>, have been established to accomplish this goal and different contractile activities were  
42 developed in these systems. Notably, spontaneous contractions have been generated in culture  
43 systems that contained both ICC and smooth muscle cells<sup>4,6,10-13</sup>. In addition, electrical-induced  
44 neurogenic contractions were also successfully produced<sup>4,5,8</sup> when ENS was introduced into  
45 culture. In one of the most recent studies, both spontaneous contractions and electrical-induced  
46 neurogenic contractions were developed in a PSC-based culture system<sup>4</sup>.

47 All of these approaches have substantially advanced the study of intestinal diseases and intestinal  
48 regeneration, yet contractions similar to those observed in native tissue have not been generated  
49 in reported *in vitro* culture systems. Freshly isolated intestinal muscle strips can display high-  
50 frequency, continuous, spontaneous and periodic contractions with distinct physical  
51 movements<sup>14,15</sup> (**Supplementary Video 1**). In this study, we sought to reproduce this type of  
52 contraction in cell culture by developing a serum-free culture methodology for intestinal  
53 muscularis cells (IMC).

54 IMC are cells isolated from the intestinal smooth muscle layers. As the cell source, IMC are  
55 accessible from patients and contain specific cell types involved in gut motility. Current primary  
56 cultures of IMC have significant limitations such that contractions of IMC *in vitro* have been  
57 transient. The traditional medium for IMC culture is a serum-containing medium<sup>8,13,16</sup>, in which  
58 smooth muscle cells rapidly de-differentiate and lose their contractility<sup>17-19</sup> while ICC<sup>11</sup> and ENS<sup>13</sup>  
59 do not survive in long term. The most common and already commercialized methods to re-  
60 differentiate smooth muscle cells are to reduce the amount of serum and to add heparin in  
61 culture<sup>20,21</sup>. However, media developed through those methods are designed only for smooth  
62 muscle cell monoculture and lack essential nutrients for other cells including neurons and ICC in  
63 IMC. Various protocols have been developed to specifically culture primary smooth muscle cells<sup>22</sup>,  
64 ICC<sup>11,12</sup>, or ENS<sup>23</sup>--or two of the three<sup>24</sup> in combination--but a single culture medium that  
65 preserves all three in one system for an extended period is still lacking. In this study, we  
66 developed such culture media and restored the spontaneous, rhythmic contractile function of  
67 IMC.

68 Intestinal tissue engineering<sup>25-27</sup> and strategies of intestinal replacement require regeneration of  
69 both functional epithelium and muscularis under defined serum-free conditions. When  
70 combined with the culture technology of epithelium<sup>28-31</sup>, the new media here can support not  
71 only cells from muscularis, but also at least 9 cell types from both mucosa and muscularis. While  
72 epithelium-muscularis co-cultures have been described in other systems<sup>4,6,7,32,33</sup>, this is the first  
73 primary-cell based epithelium-muscularis co-culture that has spontaneous, periodic contractions.

## 74 **Results**



## 75 **From culture medium of mucosa to that of muscularis**

76 We tested several medium formulations used to culture other muscle cells and also examined  
77 the medium used for intestinal epithelial cell culture<sup>28-31</sup> (EC medium) for the development of  
78 co-culture platforms. Interestingly, we found that EC medium supported the culture of IMC, with  
79 the appearance of the neural network but without spontaneous contractions (**Supplementary**  
80 **Fig. 1**). We hypothesized that the EC medium could be modified into a new formulation suitable  
81 for IMC culture. We systematically removed one or more components of the EC medium,  
82 assessed the resultant effects on cultured IMC contractility and discovered that epidermal  
83 growth factor (EGF, a well-known stimulator of cell growth) in the EC medium prevented the IMC  
84 regular contractions (**Supplementary Table 1-2, Note 1**). Upon removal of EGF, cultured IMC  
85 displayed striking spontaneous contractility (**Supplementary Table 1-2, Note 1, Video 2**). In  
86 contrast to the traditional serum-containing medium<sup>8,13,16</sup> (hereafter “serum medium”) for IMC  
87 culture, this new muscularis medium does not contain serum and has chemically defined  
88 molecules added, including B27, N2, N-acetylcysteine, Noggin, R-spondin1, and Y27632  
89 (**Methods**).

## 90 **Long-term spontaneous and periodic contractions of murine IMC**

91 The muscularis medium potently supported the spontaneous periodic contractions of IMC for  
92 over two months. Murine IMC formed interconnected cell clusters in the muscularis medium, a  
93 morphology different from that observed in the traditional serum medium (**Fig. 1a**). Without any  
94 externally applied stimuli, most clusters initiated visible spontaneous contractions within 7 days,  
95 as indicated by the distinct change of the clusters’ physical sizes under microscope

96 **(Supplementary Video 3)**. The contraction was a coordinated activity of a group of cells,  
97 indicating the possible involvement of gap junction coupling **(Supplementary Video 2-3)**. We  
98 recorded the visibly distinct contractions using video microscopy. Regions of interest (ROIs) on  
99 the contracting clusters were selected. The contraction-relaxation cycles of the cells caused  
100 periodic changes of intensity in the selected ROIs. The frequency of the intensity change  
101 represented the frequency of contractions, which was quantified through custom MATLAB  
102 scripts. By day 21, contractions were faster and more regular than contractions at day 7 **(Fig. 1b,**  
103 **Supplementary Fig. 2, Video 2-3)**. Specifically, at day 28, the distribution of contraction periods  
104 of IMC clusters was not significantly different than that of fresh muscle strips (Kolmogorov–  
105 Smirnov test,  $p > 0.05$ , **Fig. 1b-c, Supplementary Video 1-3)**. The contractions of IMC clusters  
106 resembled those of native tissue and persisted for at least 56 days, with contraction periods  
107 clustering around 2-5 seconds (>50%, **Fig. 1b-c, Supplementary Video 1-3)**. We further observed  
108 that passaged IMC in the muscularis medium also generated similar contractions  
109 **(Supplementary Video 4)**. The muscularis medium was always effective, whether or not IMC  
110 were filtered prior to seeding **(Supplementary Video 5)**. In contrast, cells in the serum medium  
111 remained static **(Fig. 1c, Supplementary Video 6)**.

## 112 **Maintenance of mature smooth muscle cells, ICC, neurons and glia**

113 Mature smooth muscle cells, ICC, neurons and glia all thrived in the muscularis medium as shown  
114 by immunofluorescence. The protein marker myosin heavy chain (MHC) is expressed only when  
115 smooth muscle cells are mature<sup>18,19</sup>. Smooth muscle cells in the muscularis medium showed  
116 intense expression of MHC and displayed features associated with the mature phenotype, such

117 as the typical fusiform shape and bundled microfilaments, indicating they were maintained at a  
118 differentiated, contractile state (**Fig. 2a, b**).

119 The muscularis medium also effectively sustained ICC (c-Kit<sup>+</sup>) which demonstrated different  
120 morphologies. Some of the c-Kit<sup>+</sup> cells were dipolar, a morphology reminiscent of the shape of  
121 intramuscular ICC; some of the c-Kit<sup>+</sup> cells were multipolar, similar to the morphology of  
122 myenteric ICC<sup>34</sup> (**Fig. 2a, c**). Multipolar c-Kit<sup>+</sup> cells connected to each other and formed networks  
123 (**Fig. 2a, c**).

124 The immunofluorescence of  $\beta$ -tubulin III<sup>35</sup> and GFAP<sup>23,36</sup> demonstrated that IMC in the muscularis  
125 medium contained numerous neurons and glial cells (respectively). Together these cells  
126 reconstituted key elements of ENS<sup>1,34</sup>, including ganglia-like structures, thick connective nerve  
127 strands out from the ganglia-like structures, and individual nerve fibers probably innervating  
128 smooth muscle cells (**Fig. 2a, d-f**). Again, neurons and glial cells with different morphologies were  
129 observed in the muscularis medium. We observed both uniaxonal neurons (similar to Dogiel type  
130 I morphology) and multipolar neurons (similar to Dogiel type II morphology) (**Fig. 2d**). In addition,  
131 we were able to pinpoint four morphologically distinct subsets of glial cells<sup>2</sup> (**Fig. 2e**).

132 Different cell types were closely associated with each other (**Fig. 2f**) in the muscularis medium.  
133 Ganglia-like structures, ICC networks, and mature smooth muscle cells together formed  
134 periodically contracting intestinal muscularis complexes among the sheet of serosal mesothelial  
135 cells (**Fig. 2f-g**). Over 2,000- $\mu$ m-long neurites (**Fig. 2d**), along with processes from glial cells, built  
136 large networks to connect these contracting intestinal muscularis complexes.

137 Compared with the muscularis medium, expressions of MHC, c-Kit, and GFAP were either low or  
138 totally absent in the traditional serum medium (**Fig. 2a**). The expression of  $\beta$ -tubulin III existed at  
139 the early time point in the serum medium but dramatically decreased with time (**Fig. 2a**).

140 The gene expression patterns examined by quantitative real-time RT-PCR further support the  
141 presence of these various cell types. During the two-month culture, IMC in the muscularis  
142 medium had consistently higher gene expression of mature smooth muscle cells (*Myh11*), ICC (*c-*  
143 *Kit*), neurons (*Tubb3*, *Rbfox3*) and glial cells (*S100 $\beta$* , *Gfap*) than in traditional serum medium (**Fig.**  
144 **3a**). In both muscularis and serum media, cultured IMC maintained  $\alpha$ -smooth muscle actin  
145 (*Acta2*), a marker that appears in both mature and synthetic smooth muscle cell phenotypes<sup>21</sup>  
146 (**Fig. 3a**). In addition, the platelet-derived growth factor receptor alpha-positive (PDGFR $\alpha^+$ ) cell is  
147 another important cell type fundamental to the pacemaker activities in the intestine<sup>3</sup>. IMC in the  
148 muscularis medium expressed high level of *Pdgfra*, suggesting the successful preservation of  
149 PDGFR $\alpha^+$  cells in the muscularis medium (**Fig. 3a**). Furthermore, different enteric neuronal  
150 markers (*Vip*, *Th*, *Calb1*, *Chat*, *Nos1*, **Fig. 3b**) were detected in the muscularis medium, indicating  
151 notable neuronal diversity in the system.

## 152 **Role of ICC, neural networks and muscle in contractile activity**

153 To ascertain whether the neural network, ICC and smooth muscle cells contributed to the  
154 contractions observed in the muscularis medium, several drugs targeting each were tested in  
155 culture. The contractions were altered accordingly when smooth muscle cells were affected by  
156 adding carbachol or sodium nitroprusside (SNP), suggesting the involvement of functional  
157 smooth muscle cells in the contractile activity. The typical concentration of carbachol, a

158 cholinergic agonist, in murine intestinal smooth muscle studies ranges from 0.1 to 100  $\mu\text{M}$ <sup>37-39</sup>.  
159 Here we tested the effects of carbachol at 10 and 50  $\mu\text{M}$ . Similar to previous observations<sup>13,40-42</sup>,  
160 the addition of carbachol caused a tonic contraction (> 1 minute, **Supplementary Video 7a** (IMC,  
161 short version for a quick view of the effect), **7b** (IMC, full version)). The effects of carbachol on  
162 IMC were similar to its action on muscle strips (**Supplementary Video 7a-b, 8** (muscle strips)). In  
163 contrast to carbachol, the smooth muscle relaxant SNP, a nitric oxide (NO) donor<sup>40,43</sup>, reduced  
164 the frequency of the contractions in a dose-dependent manner with an  $\text{IC}_{50}$  value of 24  $\mu\text{M}$  (**Fig.**  
165 **4a-b, Supplementary Video 9**). At the typical concentration, 100  $\mu\text{M}$ <sup>4,15,40</sup>, about 80-100% of the  
166 contractions were abolished (**Fig. 4a, Supplementary Video 9**).

167 The  $\text{Ca}^{2+}$ -activated  $\text{Cl}^-$  channel, Anoctamin 1 (ANO 1), is essential to the pacemaker activity of  
168 ICC<sup>44</sup>. To determine whether the periodic contractions in the muscularis medium were ICC-  
169 dependent, we blocked ANO 1 channel by niflumic acid (300  $\mu\text{M}$ <sup>44</sup>, a concentration effective for  
170 murine intestine), which resulted in the inhibition of IMC contractions (**Fig. 4c, Supplementary**  
171 **Video 10** (IMC)-**11** (muscle strips)).

172 In addition, smooth muscle contractions result from intracellular  $\text{Ca}^{2+}$  oscillations<sup>45</sup>. A functional  
173 ICC network produces periodic  $\text{Ca}^{2+}$  pulses to effect the contractile pattern<sup>45</sup>. To further examine  
174 the participation of ICC in the observed contractions, we loaded a fluorescent  $\text{Ca}^{2+}$  indicator into  
175 cultured IMC to visualize the intracellular  $\text{Ca}^{2+}$ . Fluorescence intensity change caused by  
176 intracellular  $\text{Ca}^{2+}$  flux was recorded and quantified using a customized MATLAB script. The highest  
177 fluorescence intensity represented the highest  $\text{Ca}^{2+}$  level. We observed spontaneous and periodic  
178  $\text{Ca}^{2+}$  oscillations of the contracting cell clusters in the muscularis medium (**Fig. 4d, Supplementary**  
179 **Video 12-13**). During contraction, the physical movements of cells followed the influx of  $\text{Ca}^{2+}$  with

180 a short delay (0.03-0.27 seconds, **Supplementary Video 12**). The  $\text{Ca}^{2+}$  flux also propagated from  
181 one part of the cultured IMC to another (**Supplementary Video 13**). Correlated contracting  
182 clusters experienced the influx of  $\text{Ca}^{2+}$  one by one (**Fig. 4e, Supplementary Video 13**). These  
183 results support the role of ICC in the spontaneous contractions of IMC in the muscularis medium.  
184 Next, to assess whether the contractions depended on neural signals, we applied the neural  
185 blocker tetrodotoxin (TTX) to IMC in the muscularis medium. TTX blocks neural signals by binding  
186 to the voltage-gated  $\text{Na}^+$  channels<sup>4</sup>. It has been shown before that TTX at a concentration  $\leq 10$   
187  $\mu\text{M}$  can block the electrical or chemical-induced neurogenic contractions<sup>4,39</sup>, but not the ICC-  
188 involved spontaneous contractions<sup>15,46</sup>. The spontaneous contractions of cultured IMC in the  
189 muscularis medium and fresh muscle strips continued after the administration of  $10 \mu\text{M}$  TTX, but  
190 the frequency of the contractions was decreased (**Fig. 4f, Supplementary Fig. 3, Video 14 (IMC)-**  
191 **15 (muscle strips)**). At  $400 \mu\text{M}$ , TTX terminated the contractions of cultured IMC but not fresh  
192 muscle strips (**Fig. 4f, Supplementary Fig. 3, Video 14-15**). The spontaneous contractions of  
193 muscle strips were severely disrupted when the concentration of TTX reached at  $1 \text{ mM}$   
194 (**Supplementary Fig. 3, Video 15**). The decrease of the contraction frequency with TTX at  $10 \mu\text{M}$   
195 and the full suppression of the contractions at  $400 \mu\text{M}$  indicated that contractions of IMC cultured  
196 in the muscularis medium likely involved neurogenic activities.

### 197 **Periodically contracting IMC sheets with scaffolds**

198 The IMC culture in the muscularis medium can be combined with other technologies for  
199 application in intestinal tissue engineering. For instance, IMC grown on tissue culture plastic did  
200 not form the aligned microarchitecture of the native intestinal muscle. To guide IMC to form

201 more organized structure, we incorporated an aligned electrospun poly-caprolactone (PCL) sheet  
202 into the culture system. The PCL sheets seeded with IMC periodically moved due to IMC  
203 spontaneous contractions (**Fig. 5a, Supplementary Video. 16**). MHC<sup>+</sup> smooth muscle cells and  $\beta$ -  
204 tubulin III<sup>+</sup> neuronal plexus lined up along with the PCL fiber structure, while the ICC formed a  
205 rudimentary network (**Fig. 5b-c**).

## 206 **Muscularis medium supported both epithelium and IMC**

207 Additionally, when incorporating this method with the culture technology<sup>28</sup> of intestinal  
208 epithelium, we found that the muscularis medium can support the co-culture of both epithelium  
209 and functional IMC (**Methods, Fig. 6a**). In conventional EC medium, the growth of epithelium  
210 required exogenous EGF<sup>28</sup>. Without exogenous EGF and matrigel, almost no epithelial cells from  
211 the crypts could proliferate (**Fig. 6b**). Interestingly, when directly co-cultured with IMC, even  
212 without exogenous EGF and matrigel, epithelium in the muscularis medium did proliferate (Ki67<sup>+</sup>  
213 cells, **Fig. 6b**), suggesting IMC could mediate the proliferation pattern of epithelium. In direct co-  
214 culture, the epithelium contained a variety of cell types including enterocytes (*Vil1*), goblet cells  
215 (*Muc2*), enteroendocrine cells (*ChgA*), Paneth cells (*Lyz1*) and the epithelial stem cells (*Lgr5*, **Fig.**  
216 **6c, Supplementary Fig. 4a**). Immunofluorescence showed the co-expression of chromogranin A  
217 (*Chga*), Mucin 2 (*Muc 2*), lysozyme (*Lyz*) and villin (*Vil*, **Fig. 6d**). IMC in direct co-culture continued  
218 to contract and expressed various markers of normal muscularis (**Fig. 6e, Supplementary Fig. 4b**).  
219 Immunofluorescence further confirmed the presence of mature smooth muscle cells and the  
220 network of ICC (**Fig. 6f**). Neurons and glial cells in direct co-culture retained the histotypic  
221 organization of the enteric ganglia-like structures, with interconnecting strands and dense mesh

222 of outgrowing processes (**Fig. 6f**). In addition, serosal mesothelial cells also existed in co-culture  
223 (**Supplementary Fig. 5**).

224 IMC contractions also persisted in direct co-culture (**Supplementary Video 17**). Epithelial cells  
225 mechanically interacted with IMC. Driven by the stress gradient, epithelial cells in direct co-  
226 culture were periodically stretched by the contracting IMC that pulled the adjacent cells toward  
227 themselves (**Fig. 6g, Supplementary Video 17**). The stress gradient was reflected by the non-  
228 uniform displacements within one epithelial cluster (**Fig. 6h**). The degree of strain was affected  
229 by the size of the epithelial structures and their relative location to the contracting IMC.

### 230 **Contractions of human IMC & human epithelium-IMC co-culture**

231 To realize the full potential of our new IMC system, we next investigated the capability of the  
232 muscularis medium for human cells. We noted that N-acetyl-L-cysteine (Nac), one component in  
233 the muscularis medium, can protect neurons against apoptosis<sup>47</sup> but induces apoptosis of  
234 smooth muscle cells<sup>48</sup>. Though Nac in the muscularis medium did not bring substantial damage  
235 of murine smooth muscle cells; for human smooth muscle cells, Nac considerably limited their  
236 survival and consequently attenuated human IMC contractility (**Supplementary Fig. 6**). Upon  
237 removal of Nac, human fetal and postnatal IMC in this new medium (human muscularis medium)  
238 formed similar muscularis complexes with visible, spontaneous and periodic contractions (**Fig.**  
239 **7a-b; Supplementary Fig. 7, Video 18**). The periods of contractions for human fetal IMC clustered  
240 around 10-30 seconds at day 14 and 10-40 seconds at day 28 (**Fig. 7a-b**), which was similar to  
241 those of human fetal muscle strips (**Supplementary Video 18-19**). In addition, compared with  
242 previous serum-containing media, the human muscularis medium also strongly supported the



243 growth of mature smooth muscle cells, ICC, neurons and glial cells (**Fig. 7c-e**). In this medium,  
244 mature smooth muscle cells distributed throughout the whole culture area; neurons and glia  
245 again co-localized to form structures reminiscent of the native myenteric plexus; network formed  
246 by multipolar ICC were associated with the ganglia-like structures; while dipolar ICC resided along  
247 with the smooth muscle cells (**Fig. 7c-d**). Directly co-cultured human epithelium and IMC also  
248 survived in human muscularis medium (**Fig. 7f-g**). IMC exhibited rhythmic contractions with  
249 epithelium attached on top (**Supplementary Video 20**).

## 250 **Discussion**

251 Both human and murine IMC cultured in our serum-free media (muscularis medium and human  
252 muscularis medium) possess many features that are not achievable under conventional serum-  
253 containing conditions. Contractions of IMC in traditional serum cultures are transitory and  
254 irregular<sup>5,6,41</sup>, relying on external stimuli<sup>5,41</sup>. In contrast, contractions of murine and human fetal  
255 IMC in our media are 1) spontaneous (no stimulation), 2) periodic, 3) long-term, 4) with distinct  
256 physical movements and 5) with a frequency closely resembling that of native smooth muscle  
257 (murine at day 28; human fetal from day 14 to day 28; **Fig. 1b-c, Fig. 7a, Supplementary Video 1-**  
258 **3, 18-19**). For human postnatal IMC, contractions in the human muscularis media are  
259 spontaneous, periodic, usually lasts for over 3 weeks, but slower than those associated with fetal  
260 IMC. Researchers have shown that the frequency of contractions will increase when temperature  
261 is raised<sup>10</sup>. In this report, all the contraction frequency tests, both for IMC and muscle strips, were  
262 conducted at room temperature (22°C to 25°C). Cells and tissues may contract faster at 37°C.

263 For an extended period, all critical cell populations from intestinal muscularis, including mature  
264 smooth muscle cells, “ENS” and ICC, not only survived but retained their histotypic morphology.  
265 The discovery of neurons, glia and ICC with different morphologies implies that the (human)  
266 muscularis media can preserve the microenvironment for regional specialization. Furthermore,  
267 the formation of “ENS” that shares many common features with the native myenteric plexus  
268 suggests that the muscularis media can also maintain the unique cell-cell associations within  
269 intestinal muscularis complexes. The inability of reverting intestinal smooth muscle cells into the  
270 mature phenotype *in vitro* has been often discussed in the literature<sup>17,18,49</sup>. Here we reverted  
271 non-contractile smooth muscle cells to the mature contractile phenotype by culturing them in  
272 the (human) muscularis media. Studies have suggested that neuron-smooth muscle cell  
273 interactions are essential for developments of both smooth muscle and ENS<sup>5</sup>. The acquisition of  
274 maturity for smooth muscle cells, “ENS” and ICC in the (human) muscularis media may be a result  
275 of the close connectivity among these cells.

276 The serum-free muscularis media also offer a defined environment for mechanistic studies  
277 (**Supplementary Note 2, Video 21**). In the muscularis medium, different components in  
278 combination displayed a potent synergistic effect on IMC contractility. While simpler  
279 formulations of serum-free media can be used, the efficiency of periodic contractions was  
280 reduced (**Supplementary Note 1**). In particular, we observed a marked decline of *c-Kit* expression  
281 when noggin, R-spondin1 and Y27632 were omitted (**Supplementary Fig. 8**), suggesting pathways  
282 controlled by these three components may modulate the growth and maturation of ICC.

283 In combination with other biotechnologies, the applications of the method were substantially  
284 extended. Particularly, with scaffolds, IMC can grow into the tissue model with more organized

285 architecture. With the culture technology of intestinal epithelium, the method supported at least  
286 9 (human) or 11 (murine) different types of cells, including the Lgr5<sup>+</sup> stem cells, enterocytes,  
287 goblet cells, enteroendocrine cells, Paneth cells, smooth muscle cells, ICC, PDGFR $\alpha$ <sup>+</sup> cells, neurons,  
288 glial cells and serosal mesothelial cells (**Fig. 6-7, Supplementary Fig. 5**). Our culture system may  
289 serve as a platform for more complex and comprehensive studies of other cell types as well. In  
290 addition, peristalsis normally results in periodic waves of both muscularis and mucosa. The active  
291 mechanical factor is crucial to normal tissue physiology but always missing in traditional culture  
292 systems. Although the architecture of the co-culture requires further optimization, our co-culture  
293 system has recapitulated the cyclic mechanical strains by the natural contraction of IMC and re-  
294 established this coupled mechanical relation between epithelium and muscularis. Previous  
295 studies have provided many effective approaches for achieving the correct architecture of  
296 epithelium-muscularis co-culture<sup>4,32,33,50</sup>, which can be adapted to further improve our co-culture  
297 system.

298 In summary, this is the first report of a platform that successfully maintains long-term  
299 spontaneous and periodic contractions of primary-cultured IMC in defined, serum-free  
300 conditions. The method can be broadly used and may ultimately assist in the full-thickness  
301 regeneration of functional intestine when in combination with other various technologies such  
302 as biomaterials and specific primary cell-based or pluripotent stem cell-based methods. The  
303 serum-free cultures described here can potentially become the model of choice for many studies  
304 related to intestine, and other organs containing muscle layers. The ability to support rhythmic  
305 contractions of human IMC may eventually translate this approach to clinical applications.

## 306 **Methods**

307 **Mice and human specimens.** Pregnant mice were obtained from Charles River Laboratories  
308 (Wilmington, MA) to give birth to wild-type (C57BL/6) pups. Mice expressing green fluorescent  
309 protein (GFP, C57BL/6-Tg(Actb-EGFP)1Osb/J) from a colony managed by the Division of  
310 Laboratory Animal Medicine at UCLA were also used for specific experiments. Intestinal smooth  
311 muscles were isolated from 3 to 7-day-old mice. Intestinal crypts were isolated from 6-week-old  
312 mice. All animal studies were approved by Animal Research Committee and Office of Animal  
313 Research Oversight as animal protocol number 2005-169. All efforts were made to minimize  
314 animal pain and suffering. For human materials, de-identified healthy small intestine tissues from  
315 discarded surgical samples of infant or teenager patients were obtained through the Department  
316 of Pathology Translational Pathology Core Laboratory. Fourteen to 18-week-old fetal bowels  
317 were obtained upon the written informed consent from each patient. All human studies were  
318 performed with appropriate Institutional Review Board approval.

319 **IMC isolation.** IMC isolation was performed using previously published protocols<sup>13</sup>. Intestines  
320 were removed and placed on ice in Hank's Buffered Saline Solution lacking magnesium and  
321 calcium (HBSS, Life Technologies, Carlsbad, CA) with 1x antibiotic-antimycotic (ABAM, Invitrogen,  
322 Carlsbad, CA). Intestinal muscles containing both longitudinal and circular muscle layers were  
323 carefully stripped off from the intestine using forceps and collected in HBSS buffer with 1x ABAM  
324 in 15 ml conical tubes on ice. Muscle strips in 15 ml conical tubes were then centrifuged at 1,000  
325 rpm for 5 minutes. Next, muscles were digested into single cells (IMC) by 1 mg/ml collagenase  
326 from *Clostridium histolyticum*, Type XI (Sigma, St. Louis, MO) in HBSS at 37°C for 30 minutes.

327 After the digestion, 10 ml DMEM, low glucose, GlutaMAX™ Supplement, pyruvate (Life  
328 Technologies, Carlsbad, CA) with 10% fetal bovine serum (FBS, Invitrogen) and 1x ABAM was  
329 added to terminate the process. The cells were pelleted by centrifugation at 1,000 rpm for 5  
330 minutes and re-suspended in serum medium prior to culture. IMC isolation from the human  
331 tissue followed the same methods used for mice. For all experiments, samples were randomly  
332 assigned to different experimental groups.

333 **Cell culture.** Three different culture media were used in this study: the conventional serum  
334 medium; the muscularis medium and the human muscularis medium. The conventional serum  
335 medium was DMEM with 10% fetal bovine serum (FBS, Invitrogen) and 1x ABAM. The muscularis  
336 medium consists of Advanced DMEM/Ham's F-12 (Invitrogen) with N2 (Invitrogen), B27  
337 (Invitrogen), 1 mM N-acetylcysteine (Nac, Sigma), 10 mM HEPES (Invitrogen), 2 mM GlutaMAX  
338 (Invitrogen), 100 ng/mL recombinant murine Noggin (Stemgent, Cambridge, MA), 1 µg/mL  
339 recombinant human R-spondin1 (R&D Systems, Inc., Minneapolis, MN), 10 µM Y27632  
340 (Peprotech, Rocky Hill, NJ) and ABAM. The human muscularis medium was made by subtracting  
341 Nac from the muscularis medium. For murine IMC, IMC in serum medium were plated onto the  
342 24-well culture plates (Corning, Corning, NY) with a density of 320,000 cells/well (or 48-well  
343 plates at 160,000 cells/well). IMC in all the conditions were cultured in a 37°C incubator with 10%  
344 carbon dioxide. Media were changed every other day. For culture using (human) muscularis  
345 media, IMC were first pre-cultured in serum medium for 2 days to allow cells to attach and grow,  
346 then transferred to (human) muscularis media. For passaging IMC, media were removed and 500  
347 µL TrypLE™ Select Enzyme (Life technologies) was added into each well on 24-well plates for a 5-  
348 minute incubation at 37°C. After the incubation, 500 µl DMEM with 10% FBS was added to each

349 well. The content in each well was well mixed and collected in Eppendorf tubes. A 28 gauge  
350 syringe (Fisher) was used to break up the cell clusters and the mixture was centrifuged for 5  
351 minutes at 1000 rpm. The supernatant was discarded. The pellet was resuspended into serum  
352 medium and directly placed onto a new well-plate for 2-day pre-incubation then transferred to  
353 the muscularis medium. For cells cultured in totally serum-free conditions, 10% FBS in the serum  
354 medium in the pre-incubation was replaced by 10% (10 g/100 ml) bovine serum albumin, Fraction  
355 V (BSA, Fisher Scientific, Pittsburgh, PA) and cells were pre-incubated for 4 days instead of 2 days.  
356 In most cases, IMC were unfiltered. For the experiment testing whether or not the muscularis  
357 medium was effective on filtered IMC, IMC were filtered by a 70 micron nylon filter (Corning,  
358 Corning, NY)<sup>13</sup>.

359 **Isolation of intestinal crypts.** Murine intestinal crypts were isolated by a previously reported  
360 method<sup>29</sup>. Murine intestinal tissue was removed from the animal and cut open in cold phosphate  
361 buffered saline (PBS, Life Technologies). With mucosa surface facing up, the excess mucoid  
362 material was scrapped by the tweezer tips. Next the specimen was washed several times until  
363 the solution remained clear. The specimen then was cut into approximately 1 cm<sup>2</sup> pieces,  
364 transferred into 30 ml of 2.5 mmol/L EDTA in PBS and incubated for 30 minutes at 4°C. At the end  
365 of incubation, 15 ml supernatant was discarded with intestinal fragments settled at the bottom  
366 of the tube. 15 ml of cold PBS was added into the tissue and the total 30 ml solution with tissue  
367 was vortexed for 3 seconds x 10 times. After the fragments settled down at the bottom, the  
368 supernatant was collected and saved on ice (Crypt fraction 1). 15 ml of PBS was added into the  
369 tissue again and the process was repeated six times (Crypt fraction 1-6). Samples then were  
370 centrifuged at 100 rcf for 2 minutes. About 13 ml of the supernatant was discarded and the

371 pellets were resuspended in the rest of the solution with the addition of 10% FBS. The purity of  
372 crypt fractions was examined under microscope. Several fractions were pooled together based  
373 on the need of experiments. The pooled sample were purified by the combination of a 100- $\mu$ m  
374 and a 70- $\mu$ m filters (BD Biosciences, Bedford, MA). Next the crypts were spun at 100 rcf for 2  
375 minutes and resuspended at a density of 300 crypts in 25  $\mu$ l Matrigel (BD Biosciences). The crypts  
376 with Matrigel were placed onto the 48-well culture plates. Matrigel was allowed to polymerize  
377 at 37 °C for 15 minutes. Isolation of human crypts was conducted in a similar way except that  
378 instead of 2.5 mM EDTA, 16 mM EDTA with 1 mM Dithiothreitol was used in this procedure.  
379 Murine epithelium at Passage 0 to 1 and human epithelium from adult patients at Passage 11 to  
380 12 were used for co-culture. For all experiments, samples were randomly assigned to different  
381 experimental groups.

382 **Intestinal epithelium and IMC co-culture.** IMC were cultured in the muscularis medium for 21  
383 days before adding epithelial cells. For passaged epithelial cells, epithelial cells/Matrigel with  
384 culture media were removed from the wells and collected into Eppendorf tubes. The  
385 cells/Matrigel were quickly spun for 3 seconds x 3 times. Upon removal of the supernatant, 500  
386  $\mu$ l TrypLE™ Select Enzyme was added to digest the Matrigel for 5 minutes at 37 °C. After the  
387 digestion, 500  $\mu$ l DMEM with 10% FBS was added to each tube. The content in each tube was  
388 well mixed, and quickly spun for 3 seconds x 3 times. The supernatant was discarded. The pellet  
389 was resuspended into the muscularis medium (murine cells) or human muscularis medium (human  
390 cells) and directly placed onto the cultured IMC. For fresh crypts, crypts were resuspended into  
391 the muscularis medium (murine cells) or human muscularis medium (human cells) and directly  
392 placed onto the cultured IMC after isolation. For each well on a 24-well plate, about 500 units of

393 epithelial structures or crypts were seeded on IMC. Co-culture was maintained in a 37°C  
394 incubator with 5% carbon dioxide for 4 days. IMC (for 25 days) alone or epithelium alone with  
395 Matrigel (for 4 days) in the muscularis (murine cells) or human muscularis (human cells) medium  
396 were also cultured in the same condition as controls. For the image on the right in **Fig. 6b**,  
397 epithelium alone was cultured for 4 days in the muscularis medium without Matrigel.

398 **Contractile assessment.** Contractions of IMC were analyzed using video microscopy. IMC formed  
399 contracting cell clusters when cultured in the (human) muscularis media. Fluorescence (for GFP<sup>+</sup>  
400 IMC) and phase contrast (for non-GFP IMC) videos of the cultured cell clusters or fresh muscle  
401 strips were recorded by a camera connected to the Olympus IX71 or IX73 (the updated version)  
402 microscope with CellSens software (Olympus, Center Valley, PA) at room temperature (22°C to  
403 25°C). Each video was acquired at 40x magnification which captured an area of about 3.7 mm<sup>2</sup>  
404 for 30 to 40 seconds. Multiple areas of one sample were examined. Every periodically moving cell  
405 cluster captured in videos was analyzed. Based on our previous work<sup>13</sup>, custom MATLAB  
406 programs (**Supplementary Code 1** (for fluorescence video), **Code 2-3** (for phase contrast video))  
407 were written to measure the frequency of contractions. Regions of interest (ROIs) on the  
408 contracting cell clusters were first selected. The contraction-relaxation cycles of the cells caused  
409 a periodical change of intensity in the selected ROIs. We measured the frequency of the intensity  
410 change. For GFP<sup>+</sup> cells, in the contracted state, the size of the cluster became smaller while the  
411 number of cells in each cluster remained the same, leading to an increase of the cell density, and  
412 subsequently fluorescently brighter cell clusters, i.e. an increase of the fluorescence intensity in  
413 ROIs (**Supplementary Fig. 9a**). When cells were relaxed, the size of cell clusters extended, the  
414 density of the cells decreased, and the clusters became dim, i.e. a decrease of the fluorescence



415 intensity in ROIs (**Supplementary Fig. 9a**). If cells were not contracting, no obvious intensity  
416 change could be detected. For non-GFP cells, contractions were recorded under phase contrast  
417 mode (black and white). In contrast to GFP<sup>+</sup> cells, non-GFP cell clusters in contraction state  
418 demonstrated a more compact and darker formulation than that in relaxation state, leading to a  
419 decrease in intensity (darker image, **Supplementary Fig. 9b**). In some rare cases, ROIs were  
420 selected at the periphery of contracting clusters and intensity in these ROIs changed when the  
421 cell clusters contracted to reveal the background underneath (**Supplementary Fig. 9c**). The  
422 averaged intensity value within ROIs for each frame was calculated and compared to that from  
423 the first frame in each stack to generate a normalized intensity profile. A Fast Fourier Transform  
424 (FFT) was performed on the average intensities for each region of interest in the temporal domain.  
425 Contraction frequency was then identified as the frequency response with the largest magnitude,  
426 the period of contractions as the reciprocal of the identified frequency. Programs were carefully  
427 written to acquire the sufficient sensitivity and a good signal/noise ratio for detecting the  
428 differences of the intensity among each frame. If necessary, histogram equalization was used to  
429 suppress image noises and eliminate environmental illuminations prior to the FFT.

430 **Intracellular Ca<sup>2+</sup> imaging.** IMC were cultured in the muscularis medium for 28 days. Then  
431 calcium flux was visualized using the Fluo-4 Direct™ Calcium Assay Kit<sup>13,51</sup> (Thermo Fisher  
432 Scientific) following the product protocol. Briefly, Fluo-4 AM calcium indicator was loaded in  
433 culture and incubated first at 37°C for 30 minutes, then at room temperature (22°C to 25 °C) for  
434 30 minutes. The calcium indicator expressed increased fluorescence when binding to calcium.  
435 The highest fluorescence intensity represented the highest Ca<sup>2+</sup> level. Fluorescence intensity  
436 change caused by intracellular Ca<sup>2+</sup> flux was recorded using video microscopy at room

437 temperature (22°C to 25 °C) and ROIs were selected. The frequency of fluorescence intensity  
438 change within the ROIs was quantified using custom MATLAB script (**Supplementary Code 1**).

439 **Immunofluorescence.** Prior to immunostaining, culture media were removed and samples were  
440 washed once by PBS. For MHC,  $\beta$ -tubulin III, GFAP, GFP, Chga, Vil, Muc 2, Lyz, Ki67 and cytokeratin,  
441 samples in plastic well-plates were fixed by directly adding formalin (Fisher Scientific) and  
442 incubated for 25 min at room temperature. Samples then were washed by PBS twice for 5 min  
443 each and permeabilized with 0.5% Triton X-100 (Sigma, diluted in PBS) for 5 min. After washing  
444 in PBS again, samples were incubated in a blocking solution of 4% goat serum (Vector  
445 Laboratories, Burlingame, CA) with 2% BSA in PBS for 1 hour at room temperature. Next, samples  
446 were incubated with primary antibodies overnight at 4°C, rinsed, and incubated with  
447 fluorescently-conjugated secondary antibodies for 2 hours at room temperature. All the  
448 antibodies were diluted into the blocking solution. The antibodies used were listed in  
449 **Supplementary Table 3**. For staining of c-Kit, IMC were cultured on the glass chamber slides  
450 (Fisher Scientific, seeding density: 250,000 cells/chamber) and fixed by acetone (Fisher Scientific)  
451 for 30 min at 4°C. Samples then were washed by PBS for three times for 5 min each and incubated  
452 in the blocking solution of 5% goat serum with 0.1% Triton-X in PBS for 1 hour at 4°C. Next  
453 samples were then incubated with primary antibody (**Supplementary Table 3**) overnight at 4°C,  
454 rinsed, and incubated with a fluorescently-conjugated secondary antibody (**Supplementary**  
455 **Table 3**) for 2 hours at room temperature. The primary and secondary antibodies were diluted in  
456 a solution with 5% goat serum in PBS. For phalloidin staining, Alexa Fluor® 488 phalloidin (A12379,  
457 Life Technologies, 1: 40) was added with the secondary antibodies. After the incubation of  
458 secondary antibodies, samples were washed in PBS for 3 times, each 5 min, and one drop of DAPI

459 (P36962, Life Technologies) was then added into each well or slide chamber to visualize the  
460 nucleus of the cells. Images were taken by the Olympus IX71 or IX73 microscope with CellSens  
461 software. Confocal images were taken by Inverted Zeiss LSM 880 Laser Scanning Confocal  
462 Microscope (Zeiss, Oberkochen, Germany) at Stanford Cell Science Imaging Facility.

463 **Quantitative real-time RT-PCR.** RNA was isolated from cultured IMC, freshly isolated muscle  
464 strips or crypts (as the control) with a Qias shredder (Qiagen, Germantown, MD) and RNeasy kit  
465 (Qiagen). Quantitative real-time RT-PCR was carried out with QuantiTect Probe RT-PCR kit  
466 (Qiagen) on the 7500 Real Time PCR System (Applied Biosystems, Invitrogen). Relative expression  
467 was calculated based on the  $\Delta\Delta C_t$  method with *Gapdh* as reference. For human markers, *MYH11*,  
468 *C-KIT*, *TUBB3*, *GFAP* and *GAPDH*, real-time RT-PCR was performed with qScript™ One-Step SYBR®  
469 Green qRT-PCR Kit (Quanta Biosciences, Beverly, MA). Validated primers and probes used here  
470 were listed in **Supplementary Table 3**.

471 **Pharmacological Responses.** Prior to the tests, IMC were cultured in muscularis medium for 28-  
472 35 days. Carbachol (Thermo Fisher Scientific), SNP (Sigma), and tetrodotoxin citrate (Tocris,  
473 Bristol, United Kingdom) were dissolved in distilled water as stock solution. Niflumic acid (Sigma)  
474 were dissolved in dimethyl sulphoxide (DMSO, ATCC, Manassas, VA). Prior to testing,  
475 experiments were done to show that the solvents have little effect on the mechanical behavior  
476 of cells and muscle strips. Dilutions were directly administrated into the bath medium. Each  
477 concentration for all drugs was non-cumulatively applied to individual samples (n = 3 biologically  
478 independent samples for each concentration). Carbachol was applied while recording video since  
479 the effect of carbachol was immediate. IMC with SNP, TTX and niflumic acid were incubated for  
480 3 mins<sup>52</sup>, 5 mins<sup>4</sup> and 15 mins<sup>44</sup> (respectively) at 37°C, a time enough to obtain stable responses

481 and videos were taken immediately after the incubation to record any change of cell contractility.  
482 For calculating the IC<sub>50</sub> value of SNP, an area that contained about 10 cell clusters for each sample  
483 was recorded before and after the 3-min application of SNP. For each cell cluster present in each  
484 video, we counted the number of contractions of the same clusters within one minute (COM)  
485 before (set as control) and after the administration of SNP. The inhibition effect on the  
486 contraction frequency was expressed as percent decrease of COM from control.

487 **Electrospun Scaffold.** 11% (w/w) Poly-caprolactone (PCL, Durect Lactel, Cupertino, CA) in  
488 1,1,1,3,3,3-Hexafluoro-2-propanol (HFIP, Sigma) was prepared 1-day prior to electrospinning and  
489 well mixed. A customized electrospinning set was built in the lab with a syringe pump, a high  
490 voltage supplier and a rotating mandrel as the collector. The mandrel was 3 mm in diameter. The  
491 rotating speed was 3000 rpm. The experiment was conducted at 13.5 kV and the target volume  
492 for each scaffold was 0.15 mL. The scaffold was removed from the mandrel and cut into the size  
493 of a well of a 48-well plate. Scaffolds were coated by the neutralized collagen (Advanced  
494 BioMatrix, Carlsbad, CA) prior to cell seeding. The seeding density on each scaffold was 1 million  
495 per scaffold.

496 **Statistics.** All the results were present as mean values  $\pm$  standard deviations with n indicating the  
497 number of biologically independent samples. Differences between groups were evaluated using  
498 one-way analysis of variance (ANOVA) and Tukey's post hoc method of multiple comparisons. For  
499 two-group comparison, tests for data variance were first performed. The two-tailed Student's t-  
500 test was used for two groups with equal variances. While the Student's t-test with Welch's  
501 correction was used for groups with unequal variances. Frequency counts were conducted in  
502 OriginPro 2015 (Student Version, OriginLab Corp, Northampton, MA) for histograms showing the

503 distribution of contraction periods at each time point. Differences between distributions were  
504 determined by the two-sided Kolmogorov–Smirnov test. A  $p$ -value  $<0.05$  was treated as  
505 statistically significant. Based on the concentration-inhibition curve, the  $IC_{50}$  value (the  
506 concentration that caused 50% relaxation/contraction) of SNP was obtained by fitting the data  
507 to the sigmoidal dose–response model. All the statistical studies were carried out using OriginPro  
508 2015 or 2016. Graphs were drawn using GraphPad Prism 6 (GraphPad Software Inc., San Diego  
509 CA).

510 **Code Availability.** Supplementary Code 1-3.

511 **Data Availability.** The authors declare that all data supporting the findings of this study are  
512 available within the paper and its supplementary information files.

513 **References**

- 514 1. Furness, J. B. The enteric nervous system and neurogastroenterology. *Nat. Rev.*  
515 *Gastroenterol. Hepatol.* **9**, 286–294 (2012).
- 516 2. Boesmans, W., Lasrado, R., Vanden Berghe, P. & Pachnis, V. Heterogeneity and phenotypic  
517 plasticity of glial cells in the mammalian enteric nervous system. *Glia* **63**, 229–241 (2015).
- 518 3. Blair, P. J., Rhee, P. L., Sanders, K. M. & Ward, S. M. The significance of interstitial cells in  
519 neurogastroenterology. *J. Neurogastroenterol. Motil.* **20**, 294–317 (2014).
- 520 4. Workman, M. J. *et al.* Engineered human pluripotent-stem-cell-derived intestinal tissues  
521 with a functional enteric nervous system. *Nat. Med.* **23**, 49–61 (2016).
- 522 5. Fattahi, F. *et al.* Deriving human ENS lineages for cell therapy and drug discovery in  
523 Hirschsprung disease. *Nature* **531**, 105–109 (2016).
- 524 6. Yoshida, A., Chitcholtan, K., Evans, J. J., Nock, V. & Beasley, S. W. In vitro tissue engineering  
525 of smooth muscle sheets with peristalsis using a murine induced pluripotent stem cell line.  
526 *J. Pediatr. Surg.* **47**, 329–35 (2012).
- 527 7. Kuwahara, M. *et al.* In vitro organogenesis of gut-like structures from mouse embryonic  
528 stem cells. *Neurogastroenterol Motil* **16**, 14–18 (2004).
- 529 8. Zakhem, E., Raghavan, S. & Bitar, K. N. Neo-innervation of a bioengineered intestinal  
530 smooth muscle construct around chitosan scaffold. *Biomaterials* **35**, 1882–9 (2014).
- 531 9. Wieck, M. M. *et al.* Human and murine tissue-engineered colon exhibit diverse neuronal  
532 subtypes and can be populated by enteric nervous system progenitor cells when donor  
533 colon is aganglionic. *Tissue Eng. Part A* **22**, 53–64 (2016).

- 534 10. Nakayama, S. & Torihashi, S. Spontaneous rhythmicity in cultured cell clusters isolated  
535 from mouse small intestine. *Jpn. J. Physiol.* **52**, 217–27 (2002).
- 536 11. Rich, A. *et al.* Local presentation of Steel factor increases expression of c-kit  
537 immunoreactive interstitial cells of Cajal in culture. *Am. J. Physiol. Gastrointest. Liver*  
538 *Physiol.* **284**, G313–G320 (2003).
- 539 12. Program, E. N. & Rochester, M. C. Kit / stem cell factor receptor-induced  
540 phosphatidylinositol 3  $\zeta$ -kinase signalling is not required for normal development and  
541 function of interstitial cells of Cajal in mouse gastrointestinal tract. *Neurogastroenterol*  
542 *Motil* **15**, 643–653 (2003).
- 543 13. Walthers, C. M., Lee, M., Wu, B. M. & Dunn, J. C. Y. Smooth Muscle Strips for Intestinal  
544 Tissue Engineering. *PLoS One* **9**, e114850 (2014).
- 545 14. Collins, J., Borojevic, R., Verdu, E. F., Huizinga, J. D. & Ratcliffe, E. M. Intestinal microbiota  
546 influence the early postnatal development of the enteric nervous system.  
547 *Neurogastroenterol. Motil.* **26**, 98–107 (2014).
- 548 15. Ueno, T., Duenes, J. A., Zarroug, A. E. & Sarr, M. G. Nitroergic mechanisms mediating  
549 inhibitory control of longitudinal smooth muscle contraction in mouse small intestine. *J.*  
550 *Gastrointest. Surg.* **8**, 831–841 (2004).
- 551 16. Moore-Olufemi, S. D., Olsen, a B., Hook-Dufresne, D. M., Bandla, V. & Cox, C. S.  
552 Transforming Growth Factor-Beta 3 Alters Intestinal Smooth Muscle Function: Implications  
553 for Gastroschisis-Related Intestinal Dysfunction. *Dig. Dis. Sci.* **60**, 1206–1214 (2014).
- 554 17. Bitar, K. N., Raghavan, S. & Zakhem, E. Tissue engineering in the gut: Developments in

- 555 neuromusculature. *Gastroenterology* **146**, 1614–1624 (2014).
- 556 18. Scirocco, A. *et al.* Cellular and Molecular Mechanisms of Phenotypic Switch in  
557 Gastrointestinal Smooth Muscle. *J. Cell. Physiol.* **231**, 295–302 (2016).
- 558 19. Sobue, K., Hayashi, K. & Nishida, W. Expressional regulation of smooth muscle cell-specific  
559 genes in association with phenotypic modulation. *Mol. Cell. Biochem.* **190**, 105–18 (1999).
- 560 20. Rodríguez, L. V *et al.* Clonogenic multipotent stem cells in human adipose tissue  
561 differentiate into functional smooth muscle cells. *Proc. Natl. Acad. Sci. U. S. A.* **103**, 12167–  
562 12172 (2006).
- 563 21. Brittingham, J., Phiel, C., Trzyna, W. C., Gabbeta, V. & McHugh, K. M. Identification of  
564 distinct molecular phenotypes in cultured gastrointestinal smooth muscle cells. **115**, 605–  
565 617 (1998).
- 566 22. Chamley-Campbell, J., Campbell, G. R. & Ross, R. The smooth muscle cell in culture. *Physiol.*  
567 *Rev.* **59**, 1–61 (1979).
- 568 23. Jessen, K. R., Saffrey, M. J. & Burnstock, G. The enteric nervous system in tissue culture. I.  
569 Cell types and their interactions in explants of the myenteric and submucous plexuses from  
570 guinea pig, rabbit and rat. *Brain Res.* **262**, 17–35 (1983).
- 571 24. Nakayama, S., Kajioka, S., Goto, K., Takaki, M. & Liu, H. N. Calcium-associated mechanisms  
572 in gut pacemaker activity. *J. Cell. Mol. Med.* **11**, 958–968 (2007).
- 573 25. Dunn, J. C. Y. Is the tissue-engineered intestine clinically viable? *Nat. Clin. Pract.*  
574 *Gastroenterol. Hepatol.* **5**, 366–7 (2008).
- 575 26. Shieh, S. J. & Vacanti, J. P. State-of-the-art tissue engineering: From tissue engineering to



- 576 organ building. *Surgery* **137**, 1–7 (2005).
- 577 27. Khademhosseini, A. & Langer, R. A decade of progress in tissue engineering. *Nat. Protoc.*  
578 **11**, 1775–1781 (2016).
- 579 28. Sato, T. *et al.* Single Lgr5 stem cells build crypt-villus structures in vitro without a  
580 mesenchymal niche. *Nature* **459**, 262–5 (2009).
- 581 29. Lei, N. Y. *et al.* Intestinal subepithelial myofibroblasts support the growth of intestinal  
582 epithelial stem cells. *PLoS One* **9**, e84651 (2014).
- 583 30. Lahar, N. *et al.* Intestinal subepithelial myofibroblasts support in vitro and in vivo growth  
584 of human small intestinal epithelium. *PLoS One* **6**, e26898 (2011).
- 585 31. Chen, Y. *et al.* Application of three-dimensional imaging to the intestinal crypt organoids  
586 and biopsied intestinal tissues. *Sci. World J.* **2013**, 624342 (2013).
- 587 32. Levin, D. E. *et al.* Human tissue-engineered small intestine forms from postnatal progenitor  
588 cells. *J. Pediatr. Surg.* **48**, 129–37 (2013).
- 589 33. Grikscheit, T. C. *et al.* Tissue-engineered small intestine improves recovery after massive  
590 small bowel resection. *Ann. Surg.* **240**, 748–754 (2004).
- 591 34. Komuro, T. *Atlas of Interstitial Cells of Cajal in the Gastrointestinal Tract.* (Springer  
592 Dordrecht Heigelberg London, 2012). doi:10.1017/CBO9781107415324.004
- 593 35. Hao, M. M. & Young, H. M. Development of enteric neuron diversity. *J. Cell. Mol. Med.* **13**,  
594 1193–1210 (2009).
- 595 36. Jessen, K. R. & Mirsky, R. Glial cells in the enteric nervous system contain glial fibrillary  
596 acidic protein. *Nature* **286**, 736–737 (1980).

- 597 37. Frei, E. *et al.* Calcium-dependent and calcium-independent inhibition of contraction by  
598 cGMP/cGKI in intestinal smooth muscle. *Am. J. Physiol. Gastrointest. Liver Physiol.* **297**,  
599 G834-9 (2009).
- 600 38. Yanagida, H., Yanase, H., Sanders, K. M. & Ward, S. M. Intestinal surgical resection disrupts  
601 electrical rhythmicity, neural responses, and interstitial cell networks. *Gastroenterology*  
602 **127**, 1748–1759 (2004).
- 603 39. Tsvilovsky, V. V. *et al.* Deletion of TRPC4 and TRPC6 in Mice Impairs Smooth Muscle  
604 Contraction and Intestinal Motility In Vivo. *Gastroenterology* **137**, 1415–1424 (2009).
- 605 40. Benabdallah, H., Messaoudi, D. & Gharzouli, K. The spontaneous mechanical activity of the  
606 circular smooth muscle of the rabbit colon in vitro. *Pharmacol. Res.* **57**, 132–141 (2008).
- 607 41. Azuma, Y. T., Samezawa, N., Nishiyama, K., Nakajima, H. & Takeuchi, T. Differences in time  
608 to peak carbachol-induced contractions between circular and longitudinal smooth muscles  
609 of mouse ileum. *Naunyn. Schmiedeberg's Arch. Pharmacol.* **389**, 63–72 (2016).
- 610 42. Bolton, B. T. B. The depolarizing action of acetylcholine or carbachol in intestinal smooth  
611 muscle. *J. Physiol.* 647–671 (1972).
- 612 43. Shyer, A. E. *et al.* Villification: how the gut gets its villi. *Science* **342**, 212–8 (2013).
- 613 44. Hwang, S. J. *et al.* Expression of anoctamin 1/TMEM16A by interstitial cells of Cajal is  
614 fundamental for slow wave activity in gastrointestinal muscles. *J Physiol* **587**, 4887–904  
615 (2009).
- 616 45. Berridge, M. J. Smooth muscle cell calcium activation mechanisms. *J. Physiol.* **586**, 5047–  
617 61 (2008).

- 618 46. Hara, Y., Kubota, M. & Szurszewski, J. H. Electrophysiology of smooth muscle of the small  
619 intestine of some mammals. *J. Physiol.* **372**, 501–20 (1986).
- 620 47. Chen, S. *et al.* N-acetyl-L-cysteine protects against cadmium-induced neuronal apoptosis  
621 by inhibiting ROS-dependent activation of Akt/mTOR pathway in mouse brain. *Neuropathol Appl Neurobiol.* **40**, 759–777 (2014).
- 622
- 623 48. Tsai, J. C. *et al.* Induction of apoptosis by pyrrolidinedithiocarbamate and N-acetylcysteine  
624 in vascular smooth muscle cells. *J. Biol. Chem.* **271**, 3667–70 (1996).
- 625 49. Huber, A. & Badylak, S. F. Phenotypic changes in cultured smooth muscle cells: limitation  
626 or opportunity for tissue engineering of hollow organs? *J. Tissue Eng. Regen. Med.* **6**, 505–  
627 11 (2012).
- 628 50. Kim, S. H. *et al.* Three-dimensional intestinal villi epithelium enhances protection of human  
629 intestinal cells from bacterial infection by inducing mucin expression. *Integr. Biol.* **6**, 1122–  
630 31 (2014).

631 **Additional references in Methods:**

- 632 51. Gulbransen, B. D. & Sharkey, K. A. Purinergic Neuron-to-Glia Signaling in the Enteric  
633 Nervous System. *Gastroenterology* **136**, 1349–1358 (2009).
- 634 52. McGrath, J. C., Monaghan, S., Templeton, A. G. B. & Wilson, V. G. Effects of basal and  
635 acetylcholine-induced release of endothelium-derived relaxing factor on contraction to  
636 alpha-adrenoceptor agonists in a rabbit artery and corresponding veins. *Br. J. Pharmacol.*  
637 **99**, 77–86 (1990).

638

639 **Acknowledgments**

640 This research was supported by US National Institutes of Health (NIH) grant R01 DK083119 to  
641 J.C.Y.D. and Q.W. was supported by a scholarship from China Scholarship Council (CSC). We also  
642 thank S.Y. Lewis and J. Wang for providing human intestinal epithelial cells and the RNA of human  
643 crypts; X. Guo, A. Liu and X. Bao for helpful suggestions and critical reading of the manuscript; K.  
644 Ding and Z. Wang for scientific discussions; all the staff of the Division of Laboratory Animal  
645 Medicine at UCLA; V. Ciobanu and his team at Department of Pathology and Laboratory Medicine,  
646 David Geffen School of Medicine at UCLA and staff at Ronald Reagan UCLA Medical Center for  
647 providing human tissue.

648 **Author contributions**

649 Q.W. and J.C.Y.D. conceived of and designed the experiments, interpreted results, and wrote the  
650 manuscript with contributions from other authors. Q.W. performed all the experiments and data  
651 analysis except as noted below. K.W. and C.M.W. wrote the MATLAB code for frequency analysis.  
652 K.W. also performed the optical flow analysis for videos of co-culture and human samples. R.S.S.  
653 assisted the culture of human fetal intestinal muscularis cells, performed the RT-PCR of human  
654 fetal samples and provided technical assistance of figure preparation. P.L. assisted the isolation  
655 of crypts and provided helpful advice on co-culture experiments. A.T. helped culture of human  
656 cells. M.G.M. and C.M.W. edited the manuscript.

657 **Competing Financial Interests**

658 The authors declare no competing financial interests.

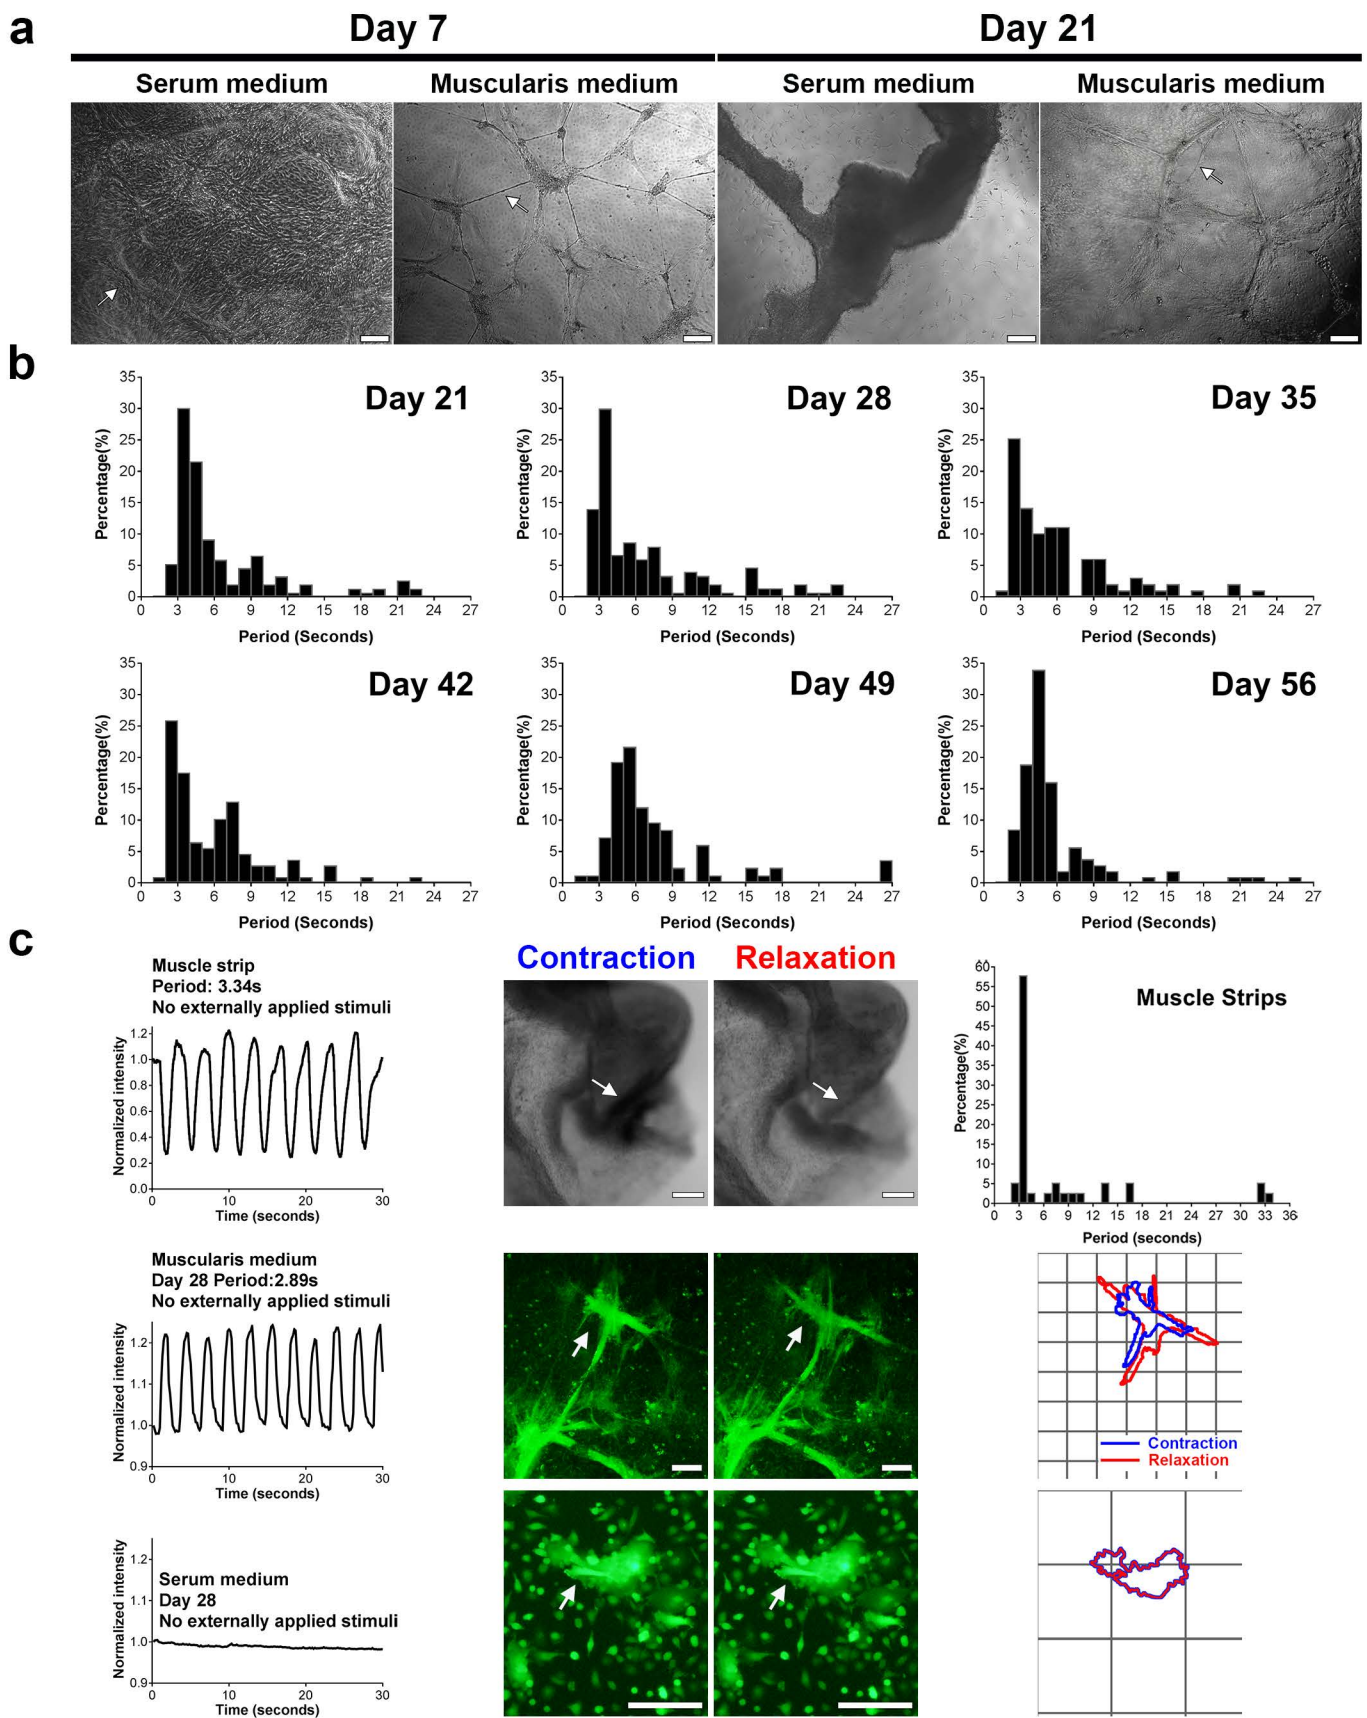

**Figure 1** | IMC in the muscularis medium exhibit long-term periodic and spontaneous contractions (no stimulation). **(a)** Representative phase contrast images of IMC in serum and muscularis media at day 7 and 21. Arrow in the first image points to the hill-and-valley pattern. Arrow in the second image indicates neurites-like connections between clusters. Arrow in the last image points to partially detached cell clusters. Scale bars, 200  $\mu\text{m}$ . **(b)** Distributions of contraction periods of IMC in the muscularis medium at 21 (153, 4; N = 153 cell clusters from n = 4 biologically independent samples), 28 (173, 6), 35 (99, 3), 42 (108, 3), 49 (83, 3) and 56 (106, 3). No externally applied stimuli. See distributions for day 7 and 14 in **Supplementary Fig. 2**. **(c)** Typical recordings of spontaneous periodic contractions (left), shape changes (arrow, middle) and outlines (right; grid, 100  $\mu\text{m}$ ) of the IMC clusters in the muscularis medium and the serum medium at day 28 as well as the recording (left) and shape changes (arrow, middle) of the contracting spot on the muscle strip. For the outline image of IMC in the serum medium: the blue line is thicker than the red line. Top right image shows the distribution of contraction periods of muscle strips (N = 38 spots from n = 9 animals). Scale bars, 100  $\mu\text{m}$ .



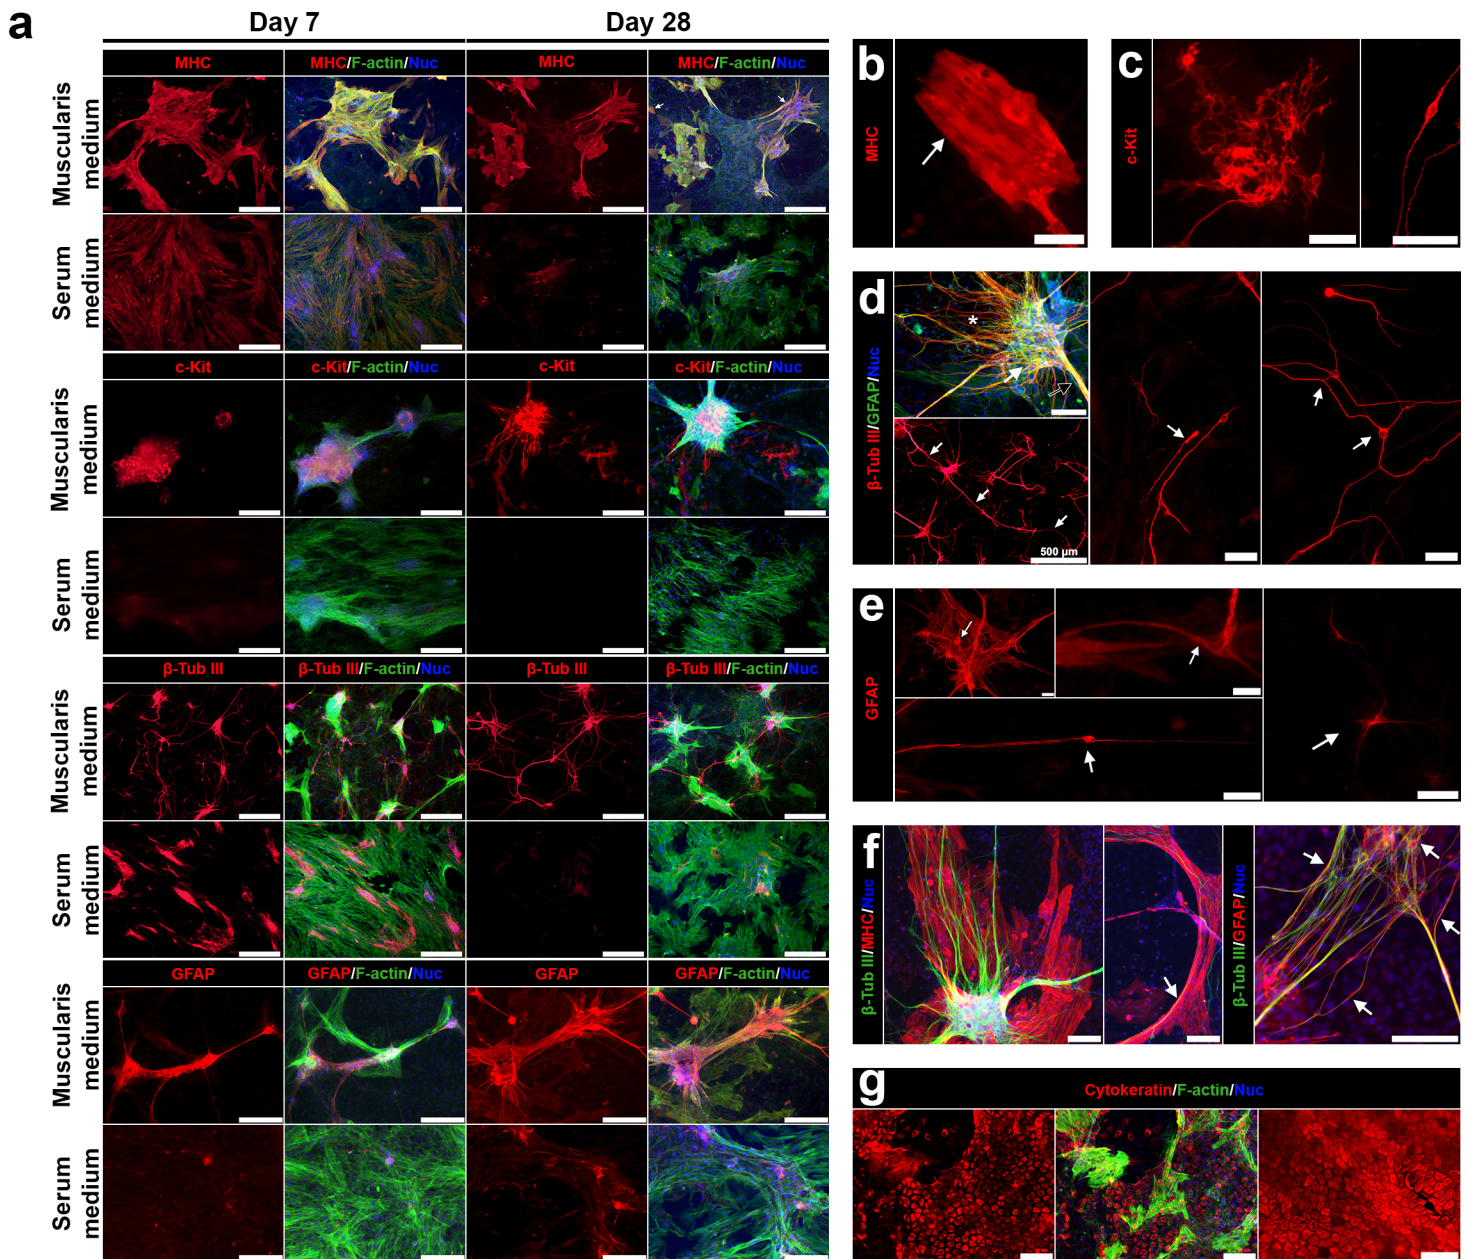

**Figure 2** | The muscularis medium maintains mature smooth muscle cells, ICC, neurons and glial cells. (a) Immunofluorescence of MHC, c-Kit,  $\beta$ -tubulin III, and GFAP in the serum or muscularis media at d7 and d28. Nuclei (DAPI, blue) and F-actin (phalloidin, green). (b-e) Details of cells in the muscularis medium at day 28. (b) Filament bundles in contractile smooth muscle cells (arrow). (c) Multipolar ICC network (left) and dipolar ICC (right, day 21). (d) Key elements of ENS reproduced in the muscularis medium: ganglia-like structures (white arrow), thick neurite bundles (black arrow) and neural fibers (white asterisks), top left, scale bar, 100  $\mu$ m; neurites extend over 2,000  $\mu$ m (left bottom, arrows, scale bars, 500  $\mu$ m); and different types of neurons (middle and right). (e) Four different types of glial cells (arrows). (f) Close associations of smooth muscle cells, neurons and glial cells (arrows). (g) Serosal mesothelial cells (cytokeratin, red) in the muscularis medium at day 28 (left, middle) and in muscle strips (right). If not mentioned, scale bars, 200  $\mu$ m (a), 50  $\mu$ m (b-e) or 100  $\mu$ m (f-g).

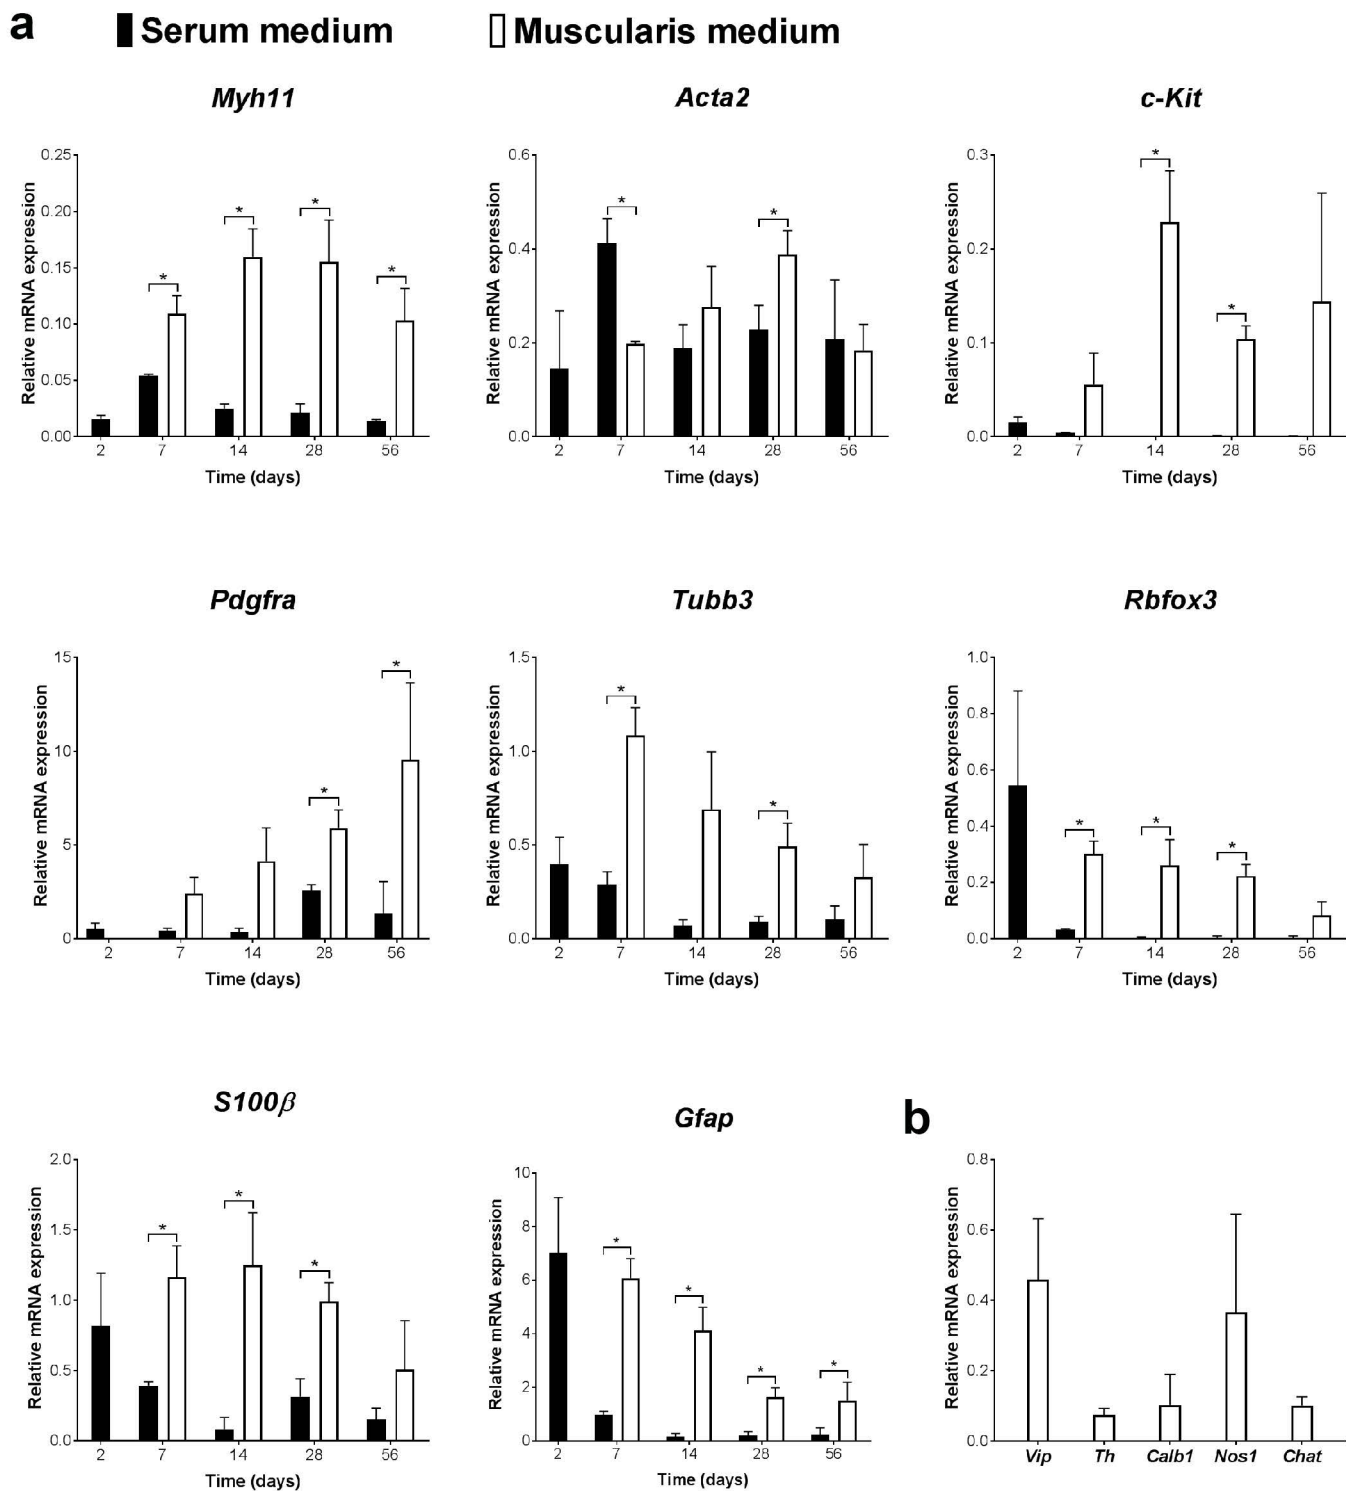

**Figure 3** | The muscularis medium maintains various cell types at the gene level. (a) Relative mRNA expression of indicated markers in serum and muscularis media at day 2 (pre-incubation in the serum medium, **Methods**), 7, 14, 28 and 56, real-time RT-PCR. (b) Relative mRNA expression of various enteric neuronal markers in the muscularis medium at day 28, real-time RT-PCR. Control: muscle strips; housekeeping gene: *Gapdh*. Error bars, S.D. (n = 3 biologically independent samples). Two-tailed Student's t-test, \**p* < 0.05.



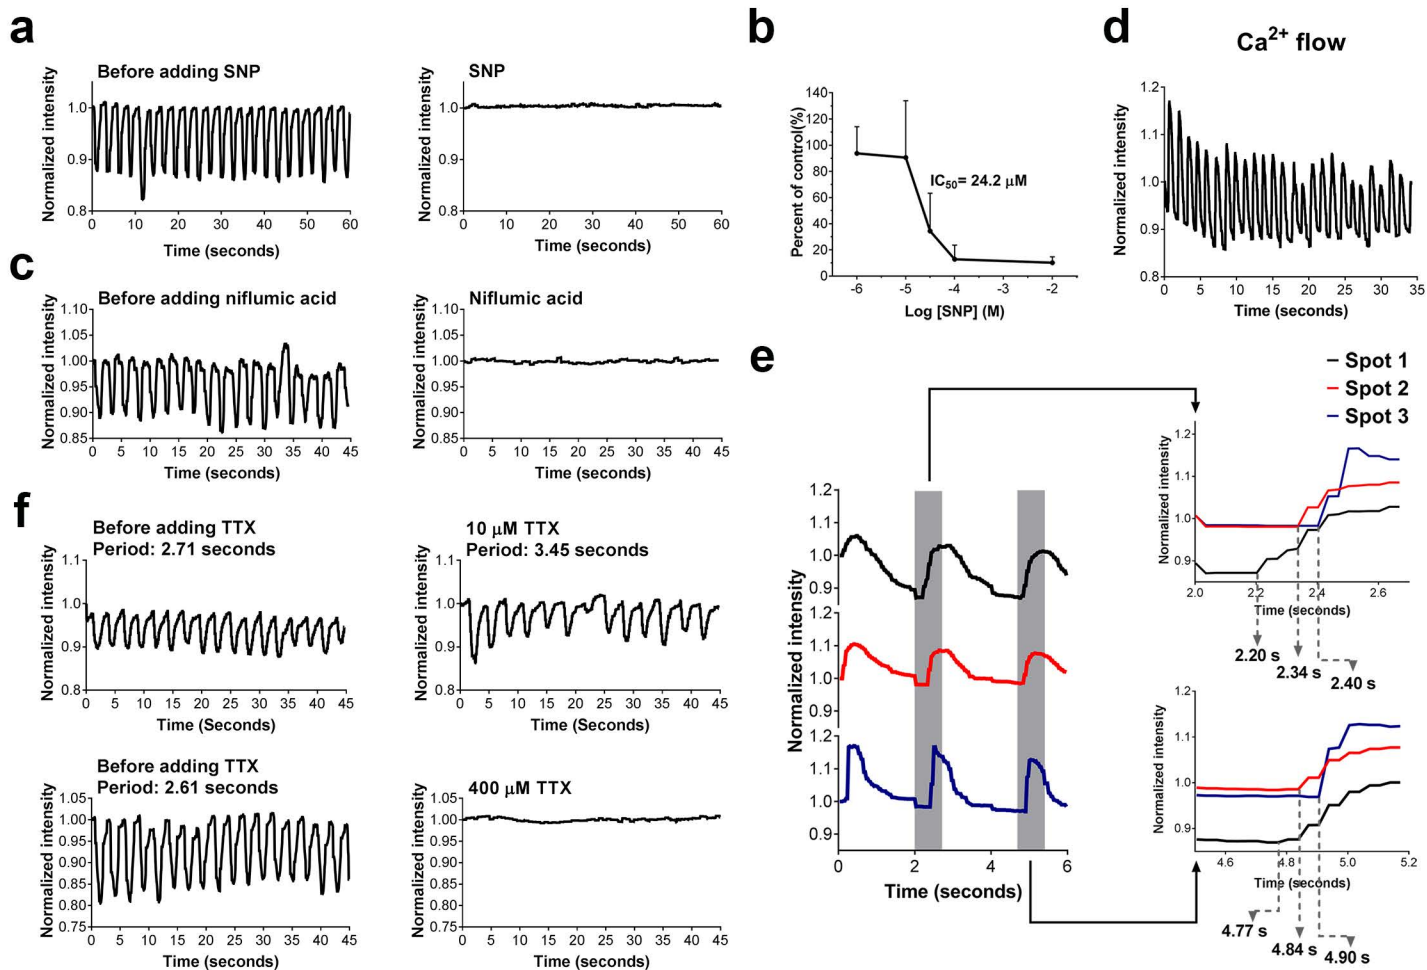

**Figure 4** | Role of smooth muscle cells, ICC and the neural network in the observed contractile activities in the muscularis medium. **(a)** Representative recordings of the effects of 100  $\mu\text{M}$  SNP on IMC cultured in the muscularis medium at d28 (**Supplementary Video 9**). **(b)** Concentration–response curve for frequency of the contractions in response to SNP. Error bars, S.D. (N = 42, 55, 36, 30, 42 cell clusters for -2, -4, -4.5, -5, -6 log [SNP] (M) respectively, each from n = 3 biologically independent samples). **(c)** Representative recordings of the effects of 300  $\mu\text{M}$  niflumic acid on IMC cultured in the muscularis medium at d35 (**Supplementary Video 10-11**). **(d)** Representative recordings of the spontaneous periodic  $\text{Ca}^{2+}$  oscillations in the muscularis medium at d28 (**Supplementary Video 12**). **(e)**  $\text{Ca}^{2+}$  influx onset was propagated along correlated contracting spots (the first three contractions shown in **Supplementary Video 13**). **(f)** Representative recordings of the effects of 10  $\mu\text{M}$  and 400  $\mu\text{M}$  TTX on IMC cultured in the muscularis medium at d28 (**Supplementary Video 14-15**). See **Supplementary Fig. 3** for TTX effects on muscle strips.



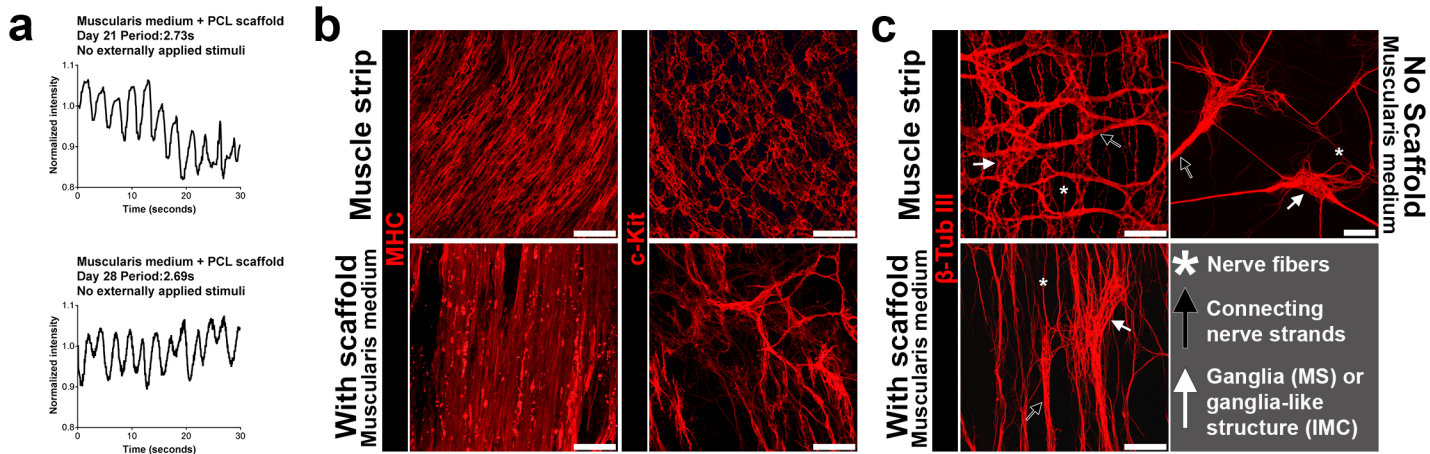

**Figure 5** | Spontaneous and Periodic contractions of IMC sheets on aligned electrospun PCL scaffolds in the muscularis medium. **(a)** Typical recordings of spontaneous periodic contractions of IMC sheets on PCL scaffolds in the muscularis medium (**Supplementary Video 16**). **(b)** Top views of mature smooth muscle cells (MHC) and ICC networks (c-Kit) in muscle strips and in IMC cultured on PCL scaffold in the muscularis medium at day 28, showing microarchitecture of muscle and ICC (confocal images, for MHC staining on muscle strips, mainly circular muscle layer). **(c)** Top views of neurons ( $\beta$ -tubulin III) in muscle strips, IMC cultured on PCL scaffold and on culture plastic in the muscularis medium at day 28, showing aligned microarchitecture of neurons (confocal images for muscle strips and IMC on scaffolds). Key elements of myenteric plexus are pointed out: ganglia in muscle strips (MS) or ganglia-like structures in cultured IMC (white arrow), thick neurite bundles (black arrow) and neural fibers (white asterisks). Scale bars, 100  $\mu$ m.

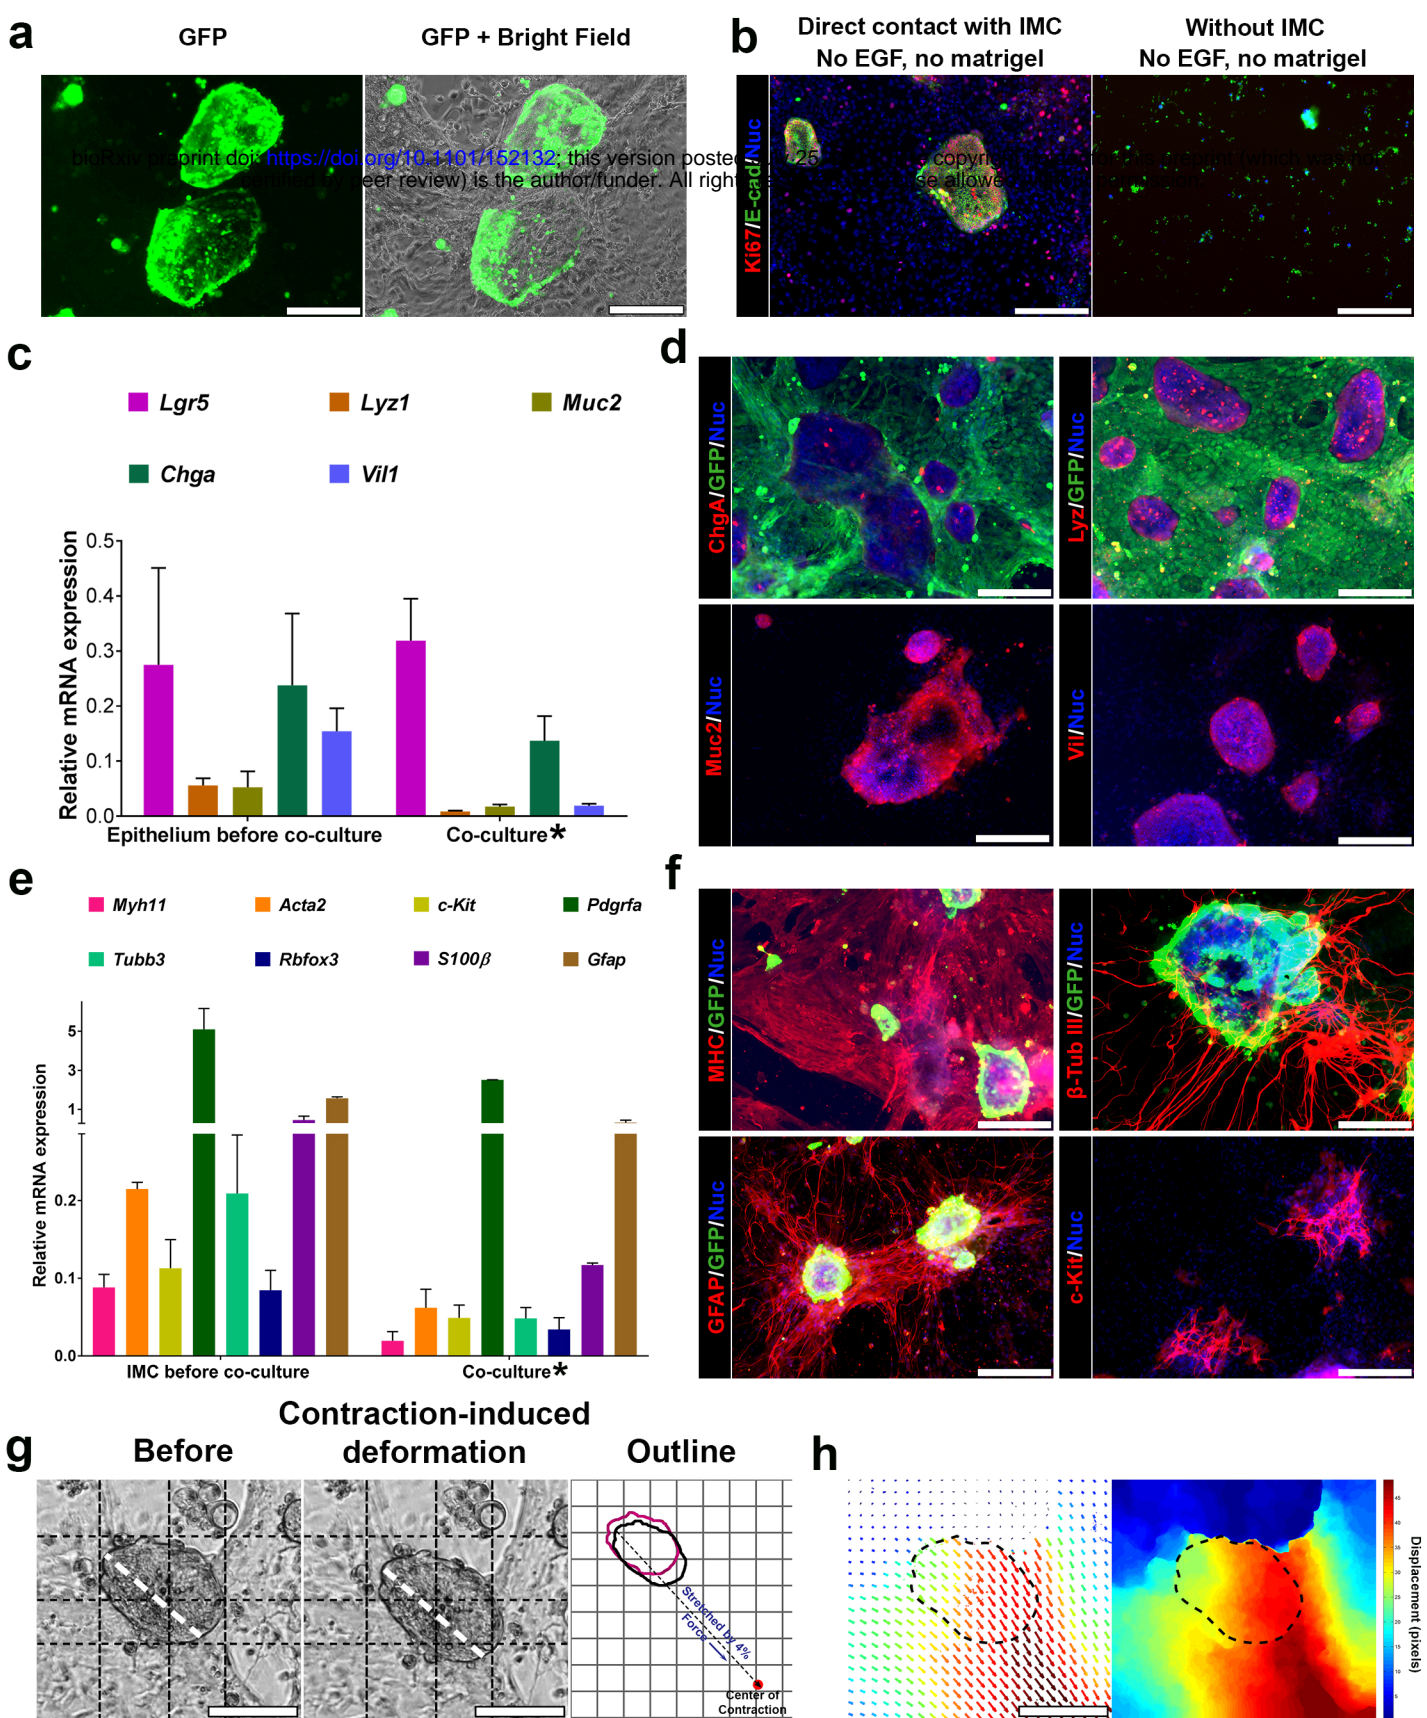

**Figure 6** | Intestinal epithelium and functional IMC both survive in the muscularis medium. **(a)** GFP epithelium after 4-day co-culture with non-GFP IMC. **(b)** Proliferation (Ki67, red) of epithelium (E-cadherin, E-cad, green) when cultured alone or with IMC. **(c)** Relative mRNA expression of indicated epithelial markers of epithelium before co-culture and cells after 4-day co-culture\*. **(d)** Immunofluorescence of ChgA, Lyz, Muc2, Vil and GFP for GFP IMC and non-GFP epithelium after 4-day co-culture. **(e)** Relative mRNA expression of indicated IMC markers of IMC before co-culture and cells after 4-day co-culture\*. **(f)** Immunofluorescence of MHC, c-Kit,  $\beta$ -tubulin III, GFAP and GFP for GFP epithelium and non-GFP IMC after 4-day co-culture. **(g)** One representative epithelial cell cluster in co-culture (**Supplementary Video 17**) before (left) and after (middle) being stretched and the outlines (right image; before: magenta; after: black; grid, 50  $\mu$ m; dashed line indicates the direction of IMC contraction). **(h)** Optical-flow analysis of the same epithelial cell cluster in **(g)**. The direction and length of arrows represent the direction and magnitude of the displacement at each location. The heat map is to visualize the magnitude of displacement of each pixel as the epithelial cell cluster being stretched. Dashed line outlines the area of the epithelial cell cluster before being stretched. RT-PCR in **(c, e)**. Control: crypts **(c)**, muscle strips **(e)**; housekeeping gene: *Gapdh*. Error bars, S.D. ( $n = 3$  biologically independent samples). Scale bars, 200  $\mu$ m **(a-b, d, f)**; 100  $\mu$ m **(g-h)**. DAPI (blue) for nuclei in **(b, d, f)**. \*The mRNA level in co-culture was normalized to *Gapdh* expressed by all cells in co-culture. However, the epithelial or IMC markers were mainly expressed by epithelial cells or IMC respectively (**Supplementary Fig. 4**). Therefore the mRNA level showed here for co-culture is artificially lower.



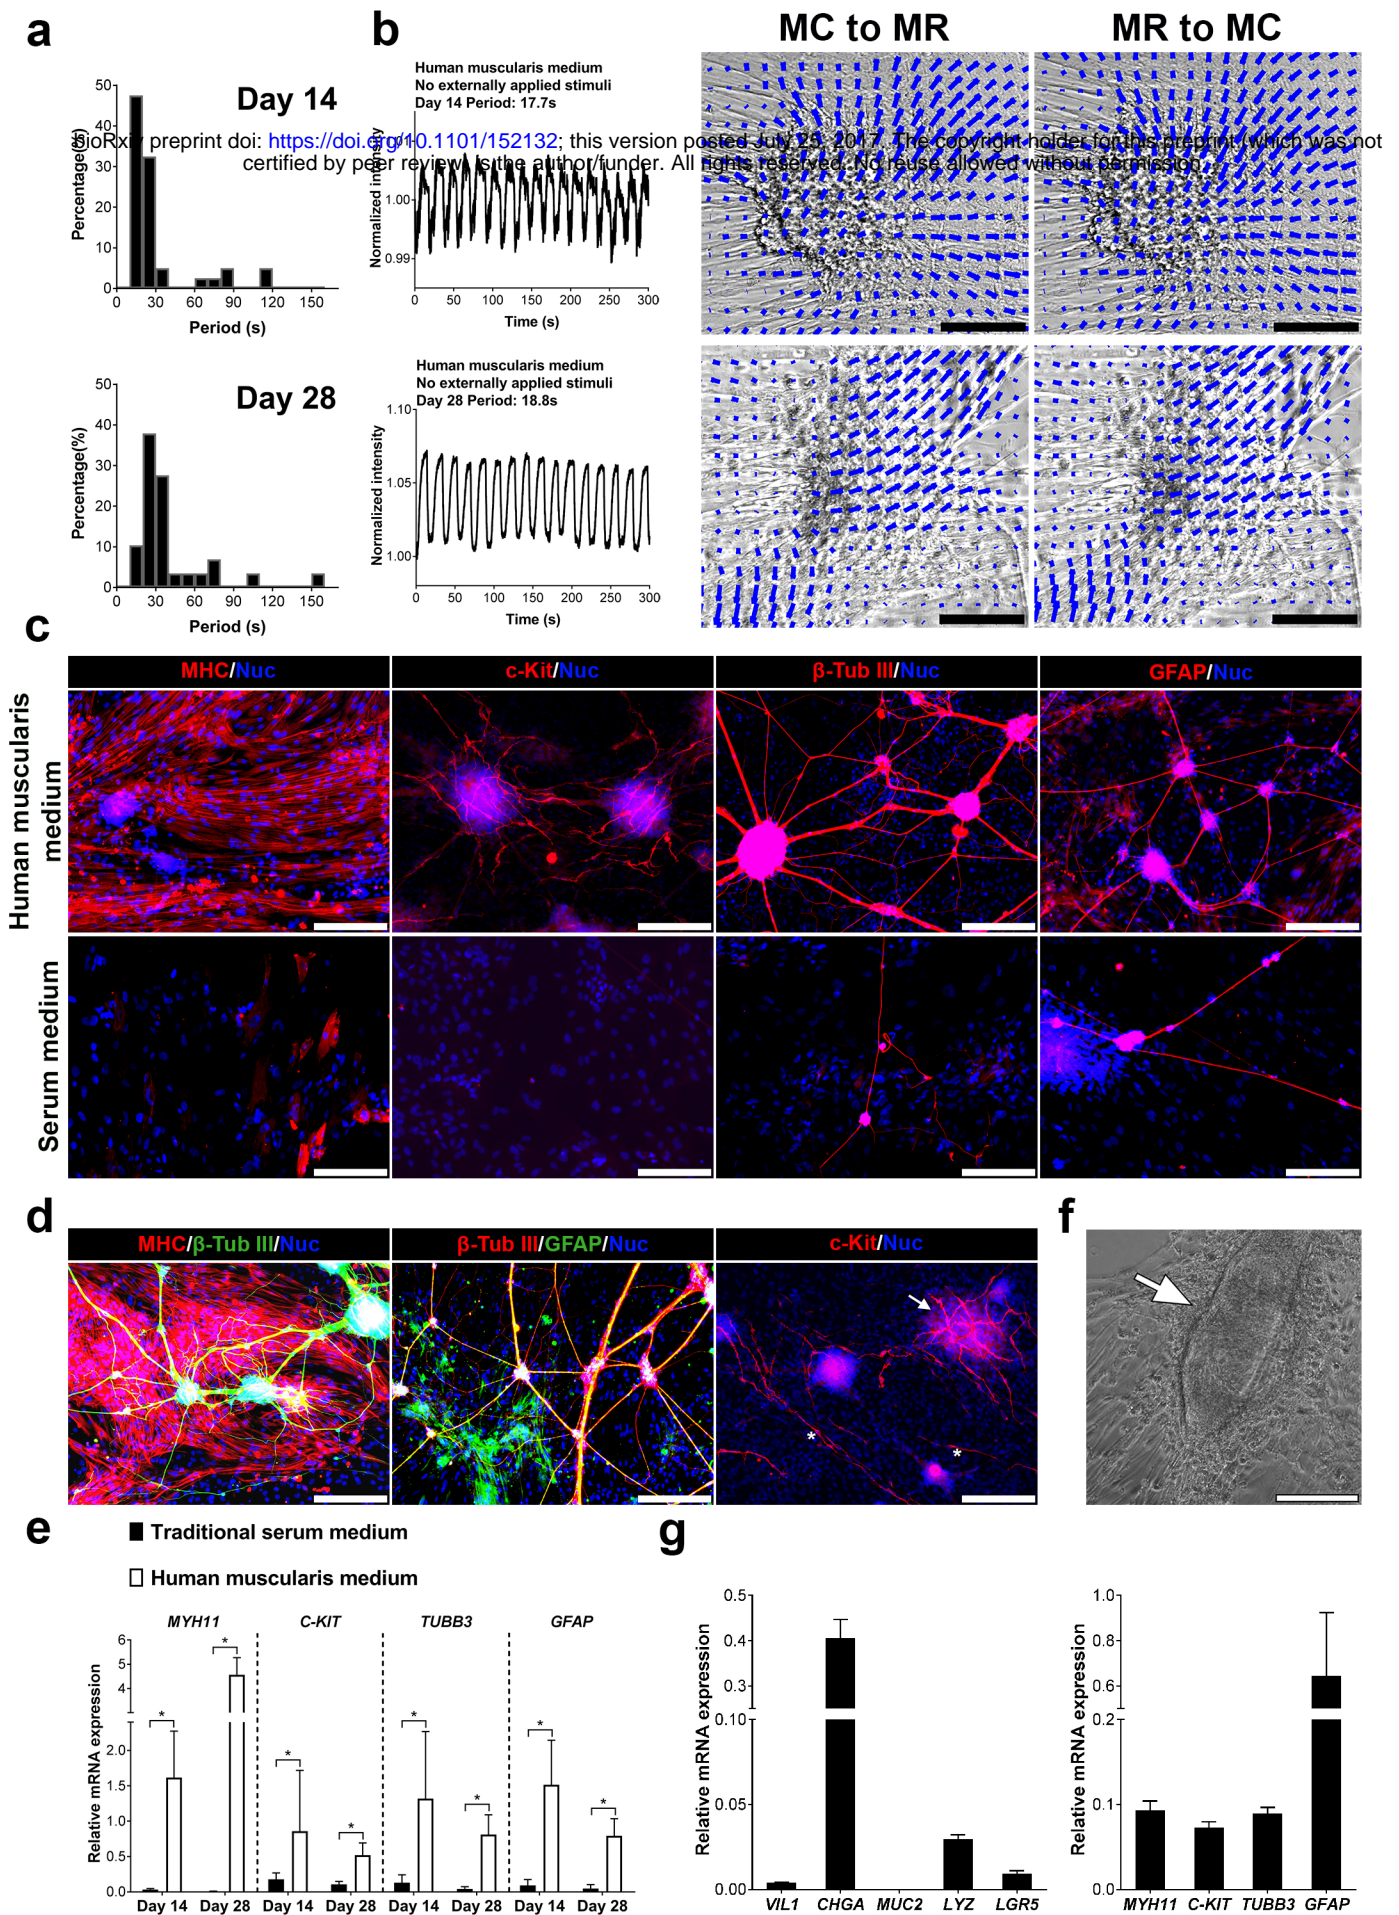

**Figure 7** | Contractility and cellular maturation of human fetal IMC and human IMC-epithelium co-culture in the human muscularis medium. (a) Distributions of contraction periods of human fetal IMC in the human muscularis medium at day 14 (40, 3; N = 40 cell clusters from n = 3 independent biological samples) and 28 (29, 3). Spontaneous contractions (no stimulation). (b) Recordings of spontaneous periodic contractions of one cell cluster in the human muscularis medium at day 14 and 28 (left). Images (right) of the same cluster from maximum contraction state to maximum relaxation state (MC to MR) and vice versa (MR to MC). See **Supplementary Video 18**. The direction and magnitude of the displacement at each location are indicated by the direction and length of each blue vector. Scale bars, 100  $\mu$ m. (c) Immunofluorescence of MHC, c-kit,  $\beta$ -tubulin III, and GFAP in the human muscularis medium at day 28. (d) Mature smooth muscle cells and neurons (left); neurons and glial cells co-localized to form "ENS" (middle); multipolar ICC network (right, arrow) and dipolar ICC (right, asterisks). (e) Relative mRNA expression of indicated markers of human fetal IMC in the traditional serum and human muscularis media at day 14 and 28. Control: human fetal muscle strips; Housekeeping gene: *GAPDH*. Error bars, S.D. (n = 9 wells from 3 independent human samples). Two-tailed Student's t-test, \**p* < 0.05. (f) IMC and human epithelium (arrow) in co-culture. (g) Relative mRNA expression of indicated epithelial or IMC markers of cells after 4-day co-culture. Control: Human crypts or human muscle strips, housekeeping gene: *GAPDH* (see note\* in Fig. 6). Error bars, S.D. (n = 3 wells). Scale bars in (c-d, f), 200  $\mu$ m.
